# Supplementary material for: Structural insights into human acid-sensing ion channel 1a inhibition by snake toxin mambalgin1
Source: eLife journal article supplement (doi:10.7554/elife.57096), 2020-09-11
Supplement: supp [file elife-57096-supp-v1.zip]

Archive with 16 entries (16 files):
- elife_poa_e57096_Figure_1_figure_supplement_1.pdf
- elife_poa_e57096_Figure_2_figure_supplement_1.pdf
- elife_poa_e57096_Figure_2_figure_supplement_2.pdf
- elife_poa_e57096_Figure_3_figure_supplement_1.pdf
- elife_poa_e57096_Figure_3_figure_supplement_2.pdf
- elife_poa_e57096_Figure_3_figure_supplement_3.pdf
- elife_poa_e57096_Figure_3_figure_supplement_4.pdf
- elife_poa_e57096_Figure_3_figure_supplement_5.pdf
- elife_poa_e57096_Figure_4_figure_supplement_1.pdf
- elife_poa_e57096_Figure_6_figure_supplement_1.pdf
- elife_poa_e57096_Figure_6_figure_supplement_2.pdf
- elife_poa_e57096_Figure_1_source_data_1.xlsx
- elife_poa_e57096_Figure_3_source_data_1.xlsx
- elife_poa_e57096_Figure_5_source_data_1.xlsx
- elife_poa_e57096_Figure_6_source_data_1.xlsx
- elife_poa_e57096_Transparent_Reporting_File.docx
