# Supplementary material for: Structural insights into human acid-sensing ion channel 1a inhibition by snake toxin mambalgin1
Source: eLife journal article supplement (doi:10.7554/elife.57096), 2020-09-11
Supplement: supp [file elife-57096-supp-v1.zip › elife_poa_e57096_Figure_1_source_data_1.xlsx]

## Sheet: Raw Data
Figure 1b: Concentration-response curve showing the inhibition of hASIC1a, hASIC1aΔC and cASIC1 by Mamba1
Mamba1 concentration (nM)	hASIC1a channel peak current (nA)
	cell-1	cell-2	cell-3	cell-4	cell-5	cell-6	ccell-7	cell-8	cell-9	cell-10	cell-11	cell-12	cell-13	cell-14	cell-15	cell-16	cell-17	cell-18	cell-19	cell-20	cell-21	cell-22	cell-23	cell-24	cell-25	cell-26	cell-27	cell-28	cell-29	cell-30	cell-31	cell-32
0	-14.0194	-15.3119	-5.72579	-5.67858	-4.71662	-5.76389	-12.9766	-15.9245	-18.3421	-15.3811	-16.4809	-20.4055	-7.67218	-7.74902	-5.26971	-11.1433	-11.1722	-8.87697	-8.87697	-8.09001	-11.4957	-14.4602	-12.1864	-6.85085	-6.4309	-8.2176	-8.18152	-10.6721	-11.6835	-11.0304	-13.7929	-10.2603
1	-14.0975					-5.32305	-12.6581		-17.4661
10		-15.0825								-13.894	-15.3731
100		-14.3763	-3.9713
200		-11.0175		-2.07526		-4.17649		-4.02492	-12.3963				-4.1849		-4.34695	-3.52237		-3.35974				-8.65333								-9.84915		-4.73658
500		-5.64377			-1.39065	-2.75873		-2.40792		-3.40421	-5.68914			-2.98318					-3.35974	-3.61101						-3.61672		-2.7111
1000		-4.31252			-0.844665				-9.41883	-3.53263		-9.61844					-1.5108				-1.13166		-2.75774	-3.63142			-0.552475				-2.91964
10000		-2.0344							-4.32154																-1.34032				-1.71508
Mamba1 concentration (nM)	cASIC1 channel peak current (nA)
	cell-1	cell-2	cell-3	cell-4	cell-5	cell-6	cell-7	cell-8	cell-9	cell-10	cell-11	cell-12	cell-13	cell-14	cell-15	cell-16	cell-17	cell-18	cell-19	cell-20	cell-21	cell-22	cell-23	cell-24	cell-25	cell-26	cell-27	cell-28
0	-19.9508	-18.2898	-5.2	-7.84951	-5.98702	-10.3218	-11.0406	-21.4508	-4.31928	-8.39472	-5.63186	-7.18618	-14.7991	-14.9594	-17.4446	-16.8728	-15.9202	-20.9556	-5.95796	-7.37371	-9.23005	-16.0891	-5.86043	-6.87536	-8.46444	-15.5334	-14.2253	-14.0194
1	-19.2243								-4.16086				-14.5106															-14.0975
10		-18.201	-5.16702			-10.2287				-8.37785			-14.2082		-15.8778										-8.92229	-15.3703
100		-17.666		-7.24295		-8.9259							-13.9526	-14.7638			-12.1234	-15.7596	-4.18916		-7.94689						-8.45548
200		-16.1892									-4.74042		-13.1205	-13.6457		-9.78213				-2.44675			-2.59326	-4.60763			-7.63551
500		-13.7111			-4.14483	-6.22872						-4.93913	-6.76783					-14.1253				-4.18394
1000		-13.6279			-4.02233		-6.55497	-8.73505					-9.94003					-15.2028				-7.16685
10000			-3.3242
Mamba1 concentration (nM)	hASIC1aΔC channel peak current (nA)
	cell-1	cell-2	cell-3	cell-4	cell-5	cell-6	cell-7
0	-11.4948	-9.1301	-11.1679	-1.93518	-7.80518	-6.03999	-5.42057
1				-1.90235	-7.14972	-6.30213	-4.83642
10	-10.8189	-8.7929	-10.892	-1.61301	-7.87774	-5.55341	-4.58397
100	-7.24023	-5.1463	-8.67401		-6.75809	-3.41336	-3.04076
200	-5.81577	-4.08793	-6.96992		-6.1771	-2.76142	-2.43172
500	-4.37278	-3.41906	-5.61022			-2.02917	-2.62011
1000	-4.39968	-3.28604	-4.94834			-2.18871	-1.67695
5000		-3.08044	-4.60668
Figure 2d. pH-dependence activation and inactivation curves of hASIC1a and hASIC1aDC
Activation curve
pH	hASIC1a channel peak current (nA)
	cell-1	cell-2	cell-3	cell-4	cell-5
5.8	-3.02878	-3.47889	-6.83265	-2.09792	-6.24812
5.9	-3.32121	-3.35393	-6.43497	-2.13447	-7.36821
6	-2.61531	-3.36293	-5.94108	-1.78237	-6.96966
6.3	-2.76998	-3.3324	-4.53429	-1.85054	-7.07785
6.5	-1.72241	-1.40583	-1.84229	-0.717616	-1.91389
6.8	-0.163947	-0.0816626			-0.096664
pH	hASIC1aΔC channel peak current (nA)
	cell-1	cell-2	cell-3	cell-4	cell-5	cell-6	cell-7	cell-8
5.8	-8.31421	-7.53923	-2.36637	-3.08234	-14.1985	-19.6214	-17.0658	-17.0658
6	-8.68007	-6.31571		-3.34408
6.3	-6.70478	-5.21706	-1.95172	-2.86123
6.4					-8.81018	-9.93676	-10.9859	-10.9859
6.5	-0.632667	-0.747016	-0.180767	-0.471988
6.8	-0.0589691	-0.0667397	-0.0462612	-0.107116
inactivation curve
pH	hASIC1a channel peak current (nA)
	cell-1	cell-2	cell-3	cell-4	cell-5	cell-6	ccell-7	cell-8	cell-9	cell-10	cell-11	cell-12	cell-13	cell-14	cell-15	cell-16	cell-17	cell-18	cell-19	cell-20	cell-21	cell-22	cell-23	cell-24	cell-25	cell-26	cell-27	cell-28	cell-29
8	-12.6907	-10.6857	-9.97973	-9.97403	-3.52877	-3.4032	-12.4619	-12.4619	-10.9278	-10.553	-10.317	-10.1474	-9.4268	-10.1445	-9.93429	-10.0483	-7.51411	-7.47351	-9.1588	-9.15622	-8.89247	-10.5745	-11.009	-11.769	-11.0678	-10.5745	-14.7267	-8.45339	-7.87237
7.8									-10.9063	-10.5483			-9.48856		-9.10106		-7.60764	-7.35552
7.6											-10.1996	-10.0857		-10.0551		-9.90905			-8.57145	-8.05632	-8.784
7.4	-12.7062	-10.9066	-9.7418	-9.10017															-7.81919	-7.72811	-7.14702
7.2							-10.5527	-10.1956														-3.93773		-9.91846	-8.45638	-11.9605	-16.4364	-7.68268	-7.82005
7					-1.65438	-1.65438																	-1.58055
6.7					-0.0515807	-0.0515807
pH	hASIC1aΔC channel peak current (nA)
	cell-1	cell-2	cell-3	cell-4	cell-5	cell-6	cell-7	cell-8	cell-9	cell-10	cell-11	cell-12	cell-13	cell-14	cell-15	cell-16	cell-17
8	-7.02774	-9.94384	-8.18714	-13.0052	-13.5397	-11.5452	-3.79882	-3.79882	-9.59007	-10.2018	-10.2018	-12.1657	-10.2018	-9.92421	-12.0041	-12.0041	-12.0041
7.8				-12.955						-10.2647	-10.9545
7.6					-13.3972							-11.4531	-10.9015
7.4					-13.6669				-9.42855					-9.9275
7.2	-5.09057	-5.67169	-5.75251			-10.0169	-3.54812		-9.11773						-8.48254
7							-2.35629	-1.80401	-2.78344						-4.034	-5.26216	-4.68718
6.7	-0.0403443			-0.0349751

## Sheet: Normalized Data
hASIC1a
mamba1 concentration (nM)
1	1.00557					0.923517	0.975452		0.952244
10		0.98502								0.903311	0.932784
100		0.938896	0.693581
200		0.71954		0.365454		0.724595		0.252751	0.67584				0.545465		0.824892	0.316098		0.378478				0.598425								0.892906
500		0.368587			0.294841	0.478623		0.151209		0.221323	0.345195			0.384975					0.378478	0.446354						0.440118		0.254035
1000		0.281645			0.179083				0.513509	0.229673		0.471365					0.135228				0.0984424		0.226296	0.530068			0.0675272
10000		0.132864							0.235608																0.208419				0.146794
cASIC1
mamba1 concentration (nM)
1	0.963582								0.963322				0.980502															1.00557
10		0.995148	0.993657			0.990981				0.997991			0.960072		0.91018										1.05409	0.989498
100		0.965896		0.922726		0.864762							0.942797	0.986923			0.76151	0.75205	0.70312		0.86098						0.594399
200		0.885148									0.841714		0.886573	0.912179		0.579759				0.331821			0.442503	0.670165			0.536757
500		0.749656			0.692303	0.603452						0.687309	0.457312					0.674057				0.260048
1000		0.745111			0.671842		0.593717	0.407213					0.671662					0.725479				0.445448
10000			0.63927
hASIC1aΔC
mamba1 concentration (nM)
1				0.983035	0.916022	1.0434	0.892235
10	0.941196	0.963068	0.975292	0.833522	1.0093	0.91944	0.845662
100	0.629868	0.563663	0.77669		0.865846	0.565127	0.560967
200	0.505946	0.447742	0.624101		0.791411	0.45719	0.44861
500	0.380413	0.374482	0.502351			0.335955	0.483365
1000	0.382753	0.359913	0.443085			0.36237	0.309368
5000		0.337394	0.412492
hASIC1a activation
pH
5.8	1	1	1	1	1
5.9	1.09655	0.964079	0.941797	1.01742	1.17927
6	0.863486	0.966667	0.869513	0.849591	1.11548
6.3	0.914553	0.957892	0.66362	0.882082	1.1328
6.5	0.568681	0.404103	0.269631	0.342061	0.306315
6.8	0.0541296	0.0234737			0.0154709
hASIC1aΔC activation
pH
5.8	1	1	1	1	1	1	1
6	1.044	0.837712		1.08492
6.3	0.806424	0.691989	0.824771	0.928265
6.4					0.6205	0.506425	0.643737
6.5	0.0760946	0.0990838	0.07639	0.153127
6.8	0.00709256	0.00885232	0.0195494	0.0347516
hASIC1a inactivation
pH
8	1	1	1	1	1	1	1	1	1	1	1	1	1	1	1	1	1	1	1	1	1	1	1	1	1	1	1	1	1
7.8									0.998028	0.99956			1.00655		0.916126		1.01245	0.984212
7.6											0.988625	0.993911		0.991183		0.98614			0.93587	0.879874	0.987802
7.4	1.00122	1.02067	0.976158	0.912386															0.853735	0.844029	0.803716
7.2							0.846799	0.818137														0.372379		0.842764	0.764055	1.13107	1.11609	0.908828	0.993355
7					0.468825	0.486124																	0.143568
6.7					0.0146172	0.0151565
hASIC1aΔC inactivation
pH
8	1	1	1	1	1	1	1	1	1	1	1	1	1	1	1	1	1
7.8				0.996138						1.00616	1.07378
7.6					0.989475							0.941426	1.06858
7.4					1.00939				0.983158					1.00033
7.2	0.724354	0.570373	0.702628			0.867628	0.934004		0.950747						0.706636
7							0.620268	0.474886	0.290242						0.336051	0.438363	0.390465
6.7	0.00574072			0.00268931
