# Supplementary material for: Structural insights into human acid-sensing ion channel 1a inhibition by snake toxin mambalgin1
Source: eLife journal article supplement (doi:10.7554/elife.57096), 2020-09-11
Supplement: supp [file elife-57096-supp-v1.zip › elife_poa_e57096_Figure_3_source_data_1.xlsx]

## Sheet: Raw Data
Figure 3e. Inhibition of wild-type hASIC1a currents by Mamba1 mutants
		Wild-type hASIC1a channel peak current (nA)
Mamba1-WT	pH 6.0	-15.3119	-4.71662	-5.76389	-15.9245	-15.3811	-16.4809	-7.74902	-8.87697	-8.09001	-8.2176	-10.6721
	pH 6.0 + Mamba1	-5.64377	-1.39065	-2.75873	-2.40792	-3.40421	-5.68914	-2.98318	-3.35974	-3.61101	-3.61672	-2.7111
Mamba1-Q5A	pH 6.0	-12.4323	-6.05723	-5.14023	-5.20289
	pH 6.0 + Mamba1	-6.39096	-2.82723	-2.59672	-2.91744
Mamba1-H6A	pH 6.0	-5.59042	-6.06597	-6.63627	-10.2535	-5.91788	-5.9615
	pH 6.0 + Mamba1	-5.80692	-5.28749	-5.6092	-8.12862	-5.97528	-6.21087
Mamba1-K8A	pH 6.0	-5.59382	-9.41623	-9.45623	-6.3423
	pH 6.0 + Mamba1	-4.21526	-7.48399	-8.36929	-4.26727
Mamba1-F27A	pH 6.0	-7.78151	-13.5282	-12.2547
	pH 6.0 + Mamba1	-8.08078	-13.4917	-11.2939
Mamba1-R28A	pH 6.0	-10.229	-13.4477	-17.2814
	pH 6.0 + Mamba1	-9.12755	-12.5621	-13.6355
Figure 3f. Inhibition of hASIC1a mutants by wild-type Mamba1
hASIC1a mutants channel peak current (nA)
hASIC1a-WT	pH 6.0	-15.3119	-4.71662	-5.76389	-15.9245	-15.3811	-16.4809	-7.74902	-8.87697	-8.09001	-8.2176	-10.6721
	pH 6.0 + Mamba1	-5.64377	-1.39065	-2.75873	-2.40792	-3.40421	-5.68914	-2.98318	-3.35974	-3.61101	-3.61672	-2.7111
hASIC1a-D347A	pH 6.0	-7.46887	-6.00632	-8.761	-7.63345	-4.50659	-7.36527
	pH 6.0 + Mamba1	-7.01581	-5.60131	-7.12815	-7.0748	-4.01549	-5.95605
hASIC1a-D351G	pH 6.0	-7.40255	-9.9299	-11.7002	-10.2648	-7.18003
	pH 6.0 + Mamba1	-5.43837	-7.87419	-5.0743	-7.00866	-5.95284
hASIC1a-F352L	pH 6.0	-6.4477	-7.70045	-4.60638	-4.96092	-7.74839
	pH 6.0 + Mamba1	-4.40804	-5.90224	-3.71444	-4.23683	-6.17861
hASIC1a-Y360A	pH 6.0	-4.30731	-3.18587	-6.60602	-6.6696
	pH 6.0 + Mamba1	-4.35497	-3.40176	-6.12223	-6.45563
Figure 3 - figure supplement 4. pH-dependent activation of the hASIC1a mutants currents.
hASIC1a
pH
5.8	-3.02878	-3.47889	-6.83265	-2.09792	-6.24812
5.9	-3.32121	-3.35393	-6.43497	-2.13447	-7.36821
6	-2.61531	-3.36293	-5.94108	-1.78237	-6.96966
6.3	-2.76998	-3.3324	-4.53429	-1.85054	-7.07785
6.5	-1.72241	-1.40583	-1.84229	-0.717616	-1.91389
6.8	-0.163947	-0.0816626			-0.096664
hASIC1a E364A
pH
4	-13.3416	-11.1226	-9.86739	-12.9245	-7.92368	-5.35515	-7.93546	-6.02429	-14.1683	-13.3614	-9.65031	-8.35996	-15.0703	-12.8163	-10.6826	-13.5074	-11.4485	-9.46594	-14.6672	-10.5491
4.5								-6.0195				-8.66101		-12.9138
5	-14.9299		-8.55876						-13.4409		-9.72427		-15.2292					-8.82092		-9.1984
5.5	-13.3037					-4.28431							-16.0125							-9.20109
5.8	-11.834
6	-10.0335														-8.20672			-7.06943
6.3		-6.57199	-5.98893	-10.2383	-5.07618		-5.94651			-9.11349			-11.9464			-5.82411	-7.45747		-9.58205
6.4		-6.21136			-5.32181		-5.03997			-7.57302			-11.1374				-6.91132	-6.312	-8.44883
6.5		-3.00764					-3.34869						-9.00245				-4.60489		-5.8918
6.6							-1.20749						-5.33571						-1.92276
6.8		-0.20769					-0.547864						-0.326661				-0.475019	-0.505062	-0.454563
7		-0.0147563					-0.00248135						-0.000965753				-0.00613547		-0.00602568
hASIC1a D351G
pH
4	-5.10787	-5.19672	-3.74631	-5.59748	-6.33878	-7.11992	-6.45045	-4.57884	-5.54194	-6.49639	-9.66879	-9.66879	-10.5634
4.5										-6.25208	-10.3066
5	-4.39649		-3.42691	-5.68905			-7.25211			-6.24239	-9.44199
5.5	-6.13119			-5.07135				-4.85544		-5.9169	-9.34314
6		-3.34759	-2.33115		-4.55316			-2.60415		-3.38036	-3.64101	-4.09101	-5.75593
6.3		-0.882401	-0.758606		-2.24672	-2.47153		-0.714832		-1.87416	-1.85003		-3.32065
6.4					-2.51983						-1.4473		-1.62665
6.5		-0.313472				-1.02109			-0.218319	-0.335079	-0.796973
6.8		-0.0333149				-0.0361416			-0.00519969		0.00368807
7						-0.00586415			0.000566343
hASIC1a Y360A
pH
4	-15.6611	-10.1404	-12.9232	-11.6396	-10.4156	-11.6446	-11.8186	-4.36769	-3.13317	-9.48861	-9.39313	-10.2728	-10.0238
4.5			-12.9869		-15.0889					-11.042			-9.68682
5	-14.8304	-9.34838			-13.5834			-4.87352		-11.1119	-8.7709		-9.26659
5.5	-14.4418		-13.5813		-12.1923			-4.48326		-9.97545	-8.31128
5.8	-13.9941		-12.907		-12.16					-9.72853
6	-11.6715			-11.5556		-10.4876		-2.12823				-9.22853	-8.51408
6.4	-10.1001			-10.7773		-10.6197			-1.2751		-7.73462		-7.91856
6.6	-6.01027			-6.8149			0.00377521				-5.88549	-6.79499	-4.92443
6.8	-1.29236			-2.15291							-1.9905	-1.93385	-1.41939
7	-0.176277			-0.172242							-0.119299		-0.158164
7.2	-0.0203378			-0.00486892
7.4	-0.00956003
hASIC1a D347A
pH
4	-8.74547	-9.14444	-12.2444	-14.2923	-14.4591	-14.0806	-13.8575	-14.3012	-10.0646	-7.61727	-8.75995	-4.47313	-4.47313	-8.47056	-6.95679	-5.74315	-5.74315	-9.1949	-10.3678
4.5									-9.42178							-4.23398	-6.29997	-8.51812	-10.9716
5	-10.0344								-8.01856		-8.96129	-4.82977		-8.92952	-7.08474		-4.47433	-9.17802
5.5	-8.09067									-7.39938	-8.56761			-9.07377	-6.57826			-9.60531
6			-5.96585	-5.44527	-6.20167	-6.42224	-10.8007	-8.0916
6.4	-1.62019	-3.21815		-0.348937
6.5		-0.443021											-0.0903556	-0.0295171				-0.480518
6.8	-0.00177675												-0.00814561	-0.00878353				-0.192777
7													-0.000930788	-0.00142249				-0.0260577
hASIC1a F352L
pH
4	-8.75082	-11.1558	-10.9143	-10.7303	-10.0531	-11.2889	-8.4599	-13.4052	-12.8647	-12.8812	-17.2008	-15.1473	-13.6895	-11.1018	-13.8638	-8.93618	-11.5418	-11.5418	-8.95077	-10.5567	-7.37476
5											-19.9512		-12.2482		-13.8453	-9.97185			-8.9958	-13.1035
5.5											-18.8761	-15.0955	-12.71	-10.5385			-11.3735	-10.1088	-8.70444	-11.0635
5.8											-17.5236	-15.2416		-10.1027			-10.605		-8.49629	-9.32361	-6.32476
6		-7.83758	-6.31205	-7.58874	-7.63032	-6.78662	-5.22596	-12.0966	-10.7906	-10.8443
6.4	-0.615752		-0.883112	-1.87246	-1.46882	-0.546157	-0.588367	-4.57969	-4.84028	-2.63414	-5.37612	-1.00668		-0.766988			-0.105844	-0.0492102	-0.154593	-2.18141
6.5											-2.37249	-0.208062			-0.278114
6.8												-0.0152494			-0.0137215			-0.00210432
7												-0.00912578			0.00253104			-0.482452	-0.00112391	-0.000173509
hASIC1a Q358A
pH
4	-10.4587	-9.87096	-9.87096	-10.0974	-9.94406	-5.51115	-4.05344
4.5		-9.6553		-11.3357	-9.39597
5	-9.92049	-9.44802		-9.49275
5.5	-9.15291	-9.51629
5.8	-9.36398	-9.38225		-9.82673		-4.86142
6	-8.25513			-9.31327			-3.51839
6.3	-7.04608	-7.68857	-8.11825	-9.32491		-3.04988
6.4	-6.68372	-7.22612		-8.75111		-2.96526
6.5	-5.9838	-5.69969		-7.52149		-1.18741
6.6	-2.41029	-2.20163		-3.78927		-0.554156
6.7	-2.23082	-1.76129		-2.22609		-0.280823
6.8	-0.437395
7	-0.0576464						-0.0156901

## Sheet: Normalized Data
	hASIC1a + mamba1
	WT	0.368587	0.294841	0.478623	0.151209	0.221323	0.345195	0.384975	0.378478	0.446354	0.440118	0.254035
	Q5A	0.514061	0.466754	0.505176	0.560735
	H6A	1.03873	0.871665	0.845234	0.792762	1.0097	1.04183
	K8A	0.753556	0.794797	0.885056	0.672828
	F27A	1.03846	0.997305	0.921601
	R28A	0.892324	0.934151	0.789028
	hASIC1a + mamba1
	WT	0.368587	0.294841	0.478623	0.151209	0.221323	0.345195	0.384975	0.378478	0.446354	0.440118	0.254035
	D347A	0.939339	0.932569	0.813623	0.926815	0.891026	0.808666
	D351G	0.734663	0.792978	0.433694	0.682786	0.829083
	F352L	0.68366	0.76648	0.806369	0.854041	0.797406
	Y360A	1.01106	1.06776	0.926766	0.967918
	hASIC1a
	pH
	5.8	1	1	1	1	1
	5.9	1.09655	0.964079	0.941797	1.01742	1.17927
	6	0.863486	0.966667	0.869513	0.849591	1.11548
	6.3	0.914553	0.957892	0.66362	0.882082	1.1328
	6.5	0.568681	0.404103	0.269631	0.342061	0.306315
	6.8	0.0541296	0.0234737			0.0154709
	hASIC1a E364A
	pH
	4	1	1	1	1	1	1	1	1	1	1	1	1	1	1	1	1	1	1	1	1
	4.5								0.999205				1.03601		1.00761
	5	1.11905		0.867378						0.948661		1.00766		1.01054					0.931859		0.871959
	5.5	0.997163					0.800036							1.06252							0.872213
	5.8	0.887005
	6	0.752046														0.76823			0.746829
	6.3		0.590868	0.606942	0.792166	0.640634		0.74936			0.682078			0.792713			0.431179	0.651395		0.653299
	6.4		0.558444			0.671633		0.63512			0.566785			0.739031				0.60369	0.666812	0.576037
	6.5		0.270407					0.421991						0.597364				0.402228		0.4017
	6.6							0.152163						0.354055						0.131093
	6.8		0.0186728					0.06904						0.0216758				0.041492	0.0533558	0.0309919
	7		0.00132669					0.000312692						6.40832e-05				0.000535921		0.000410828
	hASIC1a D351G
	pH
	4	1	1	1	1	1	1	1	1	1	1	1	1	1
	4.5										0.962392	1.06597
	5	0.860727		0.914743	1.01636			1.12428			0.9609	0.976543
	5.5	1.20034			0.906007				1.06041		0.910798	0.966319
	6		0.644173	0.622251		0.718302			0.568735		0.520345	0.376573	0.423115	0.544892
	6.3		0.169799	0.202494		0.354441	0.347129		0.156116		0.288493	0.19134		0.314353
	6.4					0.397525						0.149688		0.153989
	6.5		0.0603212				0.143414			0.039394	0.0515792	0.0824274
	6.8		0.00641075				0.00507613			0.000938245		-0.000381441
	7						0.000823626			-0.000102192
	hASIC1a Y360A
	pH
	4	1	1	1	1	1	1	1	1	1	1	1	1	1
	4.5			1.00493		1.44867					1.16371			0.966385
	5	0.946961	0.921893			1.30414			1.11581		1.17107	0.933757		0.924461
	5.5	0.922144		1.05092		1.17058			1.02646		1.05131	0.884826
	5.8	0.893558		0.998748		1.16747					1.02529
	6	0.745255			0.992781		0.900641		0.487266				0.898348	0.849388
	6.4	0.644915			0.925919		0.91198			0.406968		0.823434		0.789978
	6.6	0.383771			0.585493			-0.00031943				0.626574	0.661456	0.491276
	6.8	0.0825205			0.184964							0.211911	0.18825	0.141602
	7	0.0112557			0.014798							0.0127007		0.0157789
	7.2	0.00129862			0.000418307
	7.4	0.000610432
	hASIC1a D347A
	pH
	4	1	1	1	1	1	1	1	1	1	1	1	1	1	1	1	1	1	1	1
	4.5									0.936126							0.737223	1.09695	0.926396	1.05823
	5	1.14738								0.796706		1.02298	1.07973		1.05418	1.01839		0.779072	0.998164
	5.5	0.925126									0.971395	0.978044			1.07121	0.945588			1.04463
	6			0.48723	0.380994	0.428911	0.456104	0.779409	0.5658
	6.4	0.18526	0.351924		0.0244144
	6.5		0.0484471											0.0201996	0.00348468				0.0522591
	6.8	0.000203162												0.00182101	0.00103695				0.0209657
	7													0.000208084	0.000167934				0.00283394
	hASIC1a F352L
	pH
	4	1	1	1	1	1	1	1	1	1	1	1	1	1	1	1	1	1	1	1	1	1
	5											1.1599		0.894713		0.998666	1.1159			1.00503	1.24124
	5.5											1.0974	0.996582	0.928448	0.949259			0.985419	0.875842	0.97248	1.048
	5.8											1.01877	1.00622		0.910005			0.918834		0.949225	0.88319	0.857622
	6		0.702554	0.57833	0.707226	0.759005	0.601174	0.617733	0.902385	0.838778	0.841872
	6.4	0.0703651		0.0809134	0.174502	0.146107	0.0483798	0.0695478	0.341636	0.376246	0.204495	0.312551	0.0664595		0.069087			0.00917049	0.00426367	0.0172715	0.206637
	6.5											0.137929	0.0137359			0.0200604
	6.8												0.00100674			0.000989736			0.000182322
	7												0.000602469			-0.000182564			0.0418005	0.000125566	1.64358e-05
	hASIC1a Q358A
	pH
	4	1	1	1	1	1	1	1
	4.5		0.978152		1.12263	0.944883
	5	0.94854	0.957153		0.940116
	5.5	0.875148	0.964069
	5.8	0.895329	0.95049		0.973192		0.882107
	6	0.789308			0.922342			0.868001
	6.3	0.673706	0.778908	0.822437	0.923494		0.553402
	6.4	0.639058	0.732059		0.866668		0.538048
	6.5	0.572136	0.577419		0.744892		0.215456
	6.6	0.230458	0.223041		0.375271		0.100552
	6.7	0.213298	0.178431		0.220462		0.0509555
	6.8	0.0418211
	7	0.00551182						0.00387081
