# Supplementary material for: Structural insights into human acid-sensing ion channel 1a inhibition by snake toxin mambalgin1
Source: eLife journal article supplement (doi:10.7554/elife.57096), 2020-09-11
Supplement: supp [file elife-57096-supp-v1.zip › elife_poa_e57096_Figure_5_source_data_1.xlsx]

## Sheet: Raw Data
Figure 5c. pH-dependent activation curves of the wild type hASIC1a and hASIC1a mutants obtained in the absence or presence of Mamba1
pH value	Wild-type hASIC1a channel current
	cell-1	cell-2	cell-3	cell-4	cell-5
5.8	-3.02878	-3.47889	-6.83265	-2.09792	-6.24812
5.9	-3.32121	-3.35393	-6.43497	-2.13447	-7.36821
6	-2.61531	-3.36293	-5.94108	-1.78237	-6.96966
6.3	-2.76998	-3.3324	-4.53429	-1.85054	-7.07785
6.5	-1.72241	-1.40583	-1.84229	-0.717616	-1.91389
6.8	-0.163947	-0.0816626			-0.096664
pH value	Wild-type hASIC1a channel current recording in the presence of Mamba1 (500 nM)
	cell-1	cell-2	cell-3	cell-4	cell-5	cell-6	cell-7
4	-9.31557	-6.49568	-6.26031	-8.32005	-4.71797	-5.71557	-5.66393
5		-7.8896		-4.93109		-5.47644
5.5				-4.54594		-5.23935	-5.6056
6	-1.04663			-2.30565	-1.22639		-2.6495
6.5	-0.914654			-0.179277			-0.893104
6.8			-0.0981194				-0.496905
pH value	hASIC1a-D347A channel current
	cell-1	cell-2	cell-3	cell-4	cell-5	cell-6	cell-7	cell-8
4	-2.83984	-4.73533	-5.44715	-3.49501	-7.88128	-6.41887	-5.84547	-6.50659
5	-2.5701	-4.5158	-6.5759	-3.49733	-7.05188	-6.46862	-6.18033	-6.53185
5.5	-2.28848	-4.19269	-5.54329	-3.34191	-7.24122	-6.41409	-7.03361
6					-2.91258	-2.45386	-1.16775	-1.52254
6.3	-0.254747	-0.412112	-0.630592	-0.578926	-0.303594	-0.492118	-0.59625	-0.296997
6.5	-0.289884	-0.0956332	-0.227855	-0.068049	-0.0972085	-0.147401	-0.121126
6.8	-0.209434	-0.0243145	-0.0437551
pH value	hASIC1a-D347A channel current recording in the presence of Mamba1 (500 nM)
	cell-1	cell-2	cell-3	cell-4	cell-5	cell-6	cell-7	cell-8	cell-9
5	-14.7686	-16.5659	-11.4884	-11.4884	-11.4884	-13.8725	-12.6357	-11.769	-14.8493
5.5	-15.2062	-16.178	-11.9712			-13.4697	-11.6132		-14.8674
5.8		-4.77994				-4.56206	-3.59338	-2.35639	-4.7621
6		-1.17461	-1.56107	-2.52892	-2.47245	-1.17746		-0.658588	-1.51046
6.3		-0.143427	-0.216348
6.5			-0.038136
pH value	hASIC1a-D351G channel current
	cell-1	cell-2	cell-3	cell-4	cell-5	cell-6	cell-7	cell-8	cell-9
4	-5.23994	-4.02605	-6.58244	-4.07845	-4.50776	-0.0945623	-12.0521	-12.7371	-14.054
5	-4.96511	-3.84056	-7.18013	-3.26119	-5.20244	-0.105595	-12.7831	-10.0259
5.5	-4.45249	-3.34409	-5.8728	-2.5698	-4.41446	-0.0791739	-8.90922		-13.7266
6	-3.75725	-2.43203	-4.29851	-1.9276	-2.64976	-0.0556189	-3.23126	-6.33879	-5.7117
6.5	-0.096445	-0.0794957	-0.225019	-0.078378	-0.0914135	-0.0130178	-0.312615	-0.232894	-0.182872
6.8	-0.0569817	-0.0218662	-0.0457639			-0.012632	-0.0477913	-0.0601475	-0.225499
pH value	hASIC1a-D351G channel current recording in the presence of Mamba1
	cell-1	cell-2	cell-3	cell-4	cell-5	cell-6
5	-14.7686	-9.20898	-16.0324	-16.0324	-16.0324	-16.0324
5.5		-9.01677	-15.8941
5.8			-6.87402	-5.46306
6			-1.17338	-1.77075	-2.12882	-2.26771
6.3		-1.46059	-0.181515
6.5	-0.004654	-0.02765
6.8	-0.00895
pH value	hASIC1a-F352L channel current
	cell-1	cell-2	cell-3	cell-4	cell-5	cell-6	cell-7	cell-8	cell-9	cell-10	cell-11	cell-12	cell-13	cell-14	cell-15	cell-16	cell-17	cell-18	cell-19	cell-20	cell-21
4	-8.75082	-11.1558	-10.9143	-10.7303	-10.0531	-11.2889	-8.4599	-13.4052	-12.8647	-12.8812	-17.2008	-15.1473	-13.6895	-11.1018	-13.8638	-8.93618	-11.5418	-11.5418	-8.95077	-10.5567	-7.37476
5											-19.9512		-12.2482		-13.8453	-9.97185			-8.9958	-13.1035
5.5											-18.8761	-15.0955	-12.71	-10.5385			-11.3735	-10.1088	-8.70444	-11.0635
5.8											-17.5236	-15.2416		-10.1027			-10.605		-8.49629	-9.32361	-6.32476
6		-7.83758	-6.31205	-7.58874	-7.63032	-6.78662	-5.22596	-12.0966	-10.7906	-10.8443
6.4	-0.615752		-0.883112	-1.87246	-1.46882	-0.546157	-0.588367	-4.57969	-4.84028	-2.63414	-5.37612	-1.00668		-0.766988			-0.105844	-0.0492102	-0.154593	-2.18141
6.5											-2.37249	-0.208062			-0.278114
6.8												-0.0152494			-0.0137215			-0.00210432
7												-0.00912578			0.00253104			-0.482452	-0.00112391	-0.000173509
pH value	hASIC1a-F352L channel current recording in the presence of Mamba1 (500 nM)
	cell-1	cell-2	cell-3	cell-4	cell-5	cell-6	cell-7	cell-8	cell-9	cell-10	cell-11	cell-12	cell-13
5	-7.12203	-4.94289	-7.39016	-11.5838	-11.5838	-11.5838	-11.5838	-11.5838	-12.5244	-12.0933	-12.4713	-5.82908	-6.02564
5.5	-7.28472	-5.13134	-6.29768	-10.9118					-12.0785	-12.0831	-12.3868	-5.57599	-6.12854
5.8				-8.93146							-5.85208	-2.93376	-3.7451
6	-6.08574	-4.34246	-2.08163	-5.76795	-8.23393	-3.38585	-3.09889	-3.14253		-6.53683	-2.32249	-1.46651	-1.03253
6.3	-1.15181	-1.29938	-0.348117								-1.1872
6.5	-0.199849	-0.0839179	-0.0439867								-0.012945	-0.17943
6.8	-0.0213414	-0.0112745
Figure 5d. Inhibition of hASIC1a current statistics with administrations of Mamba1 at pH 6.0 and pH 8.0
Stimulation	Paek current after stimulaion
pH 6.0	-5.52131	-8.39099	-4.01298	-9.12533	-9.38121	-7.21087	-6.06124	-6.06127	-6.06157	-6.06635	-9.41121	-9.12533
Mamba1 + pH 6.0						-5.68626	-5.64255	-6.12731	-5.38203	-5.41299	-7.87072	-8.96464
Mamba1 + pH 8.0	-2.44715	-4.72143	-2.34021	-5.16209	-3.34202
Stimulation	Current at the end of stimulation (30 s)
pH 6.0	-0.0268847	-0.0181657	-0.0251228	-0.0440278	-0.0289803	-0.0729425	-0.0207511	-0.017923	-0.0178606
Mamba1 + pH 6.0				-0.0408713		-0.0554693	-0.0187824	-0.0179457	-0.0177399
Mamba1 + pH 8.0	-0.0168014	-0.00996533	-0.0104487	-0.0077129	-0.0214644

## Sheet: Normalized Data
	hASIC1a
	mamba1 treatment	peak current
	mamba1 + pH=6.0						0.788567	0.930923	1.0109	0.887894	0.892298	0.836313	0.98239
	mamba1 + pH=8.0	0.443219	0.562678	0.58316	0.565688	0.356246
	hASIC1a
	mamba1 treatment	current after 30 s acids application
	mamba1 + pH=6.0				0.928305		0.760453	0.905129	1.00127	0.993243
	mamba1 + pH=8.0	0.624942	0.54858	0.415905	0.175182	0.740653
	hASIC1a
	pH
	5.8	1	1	1	1	1
	5.9	1.09655	0.964079	0.941797	1.01742	1.17927
	6	0.863486	0.966667	0.869513	0.849591	1.11548
	6.3	0.914553	0.957892	0.66362	0.882082	1.1328
	6.5	0.568681	0.404103	0.269631	0.342061	0.306315
	6.8	0.0541296	0.0234737			0.0154709
	hASIC1a + mamba1
	pH
	4	1	1	1	1	1	1	1
	5		1.21459		0.592676		0.958162
	5.5				0.546384		0.916681	0.989702
	6	0.112353			0.27712	0.25994		0.467785
	6.5	0.0981855			0.0215476			0.157683
	6.8			0.0156733				0.0877315
	hASIC1a D347A
	pH
	4	1	1	1	1	1	1	1	1
	5	0.905013	0.953641	1.20722	1.00067	0.894764	1.00775	1.05728	1.00388
	5.5	0.805848	0.885407	1.01765	0.956195	0.918787	0.999255	1.20326
	6					0.369556	0.382289	0.19977	0.233999
	6.3	0.0897046	0.0870292	0.115765	0.165644	0.0385208	0.0766674	0.102002	0.0456456
	6.5	0.102077	0.0201957	0.0418301	0.0194704	0.0123341	0.0229637	0.0207214
	6.8	0.0737486	0.00513471	0.00803267
	hASIC1a D347A + mamba1
	pH
	5	1	1	1	1	1	1	1	1	1
	5.5	1.02963	0.976585	1.04203			0.970965	0.919078		1.00122
	5.8		0.28854				0.328857	0.284383	0.20022	0.320695
	6		0.0709053	0.135883	0.220129	0.215213	0.0848774		0.0559596	0.101719
	6.3		0.00865794	0.0188319
	6.5			0.00331954
	hASIC1a D351G
	pH
	4	1	1	1	1	1	1	1	1	1
	5	0.94755	0.953927	1.0908	0.799614	1.15411	1.11667	1.06065	0.787145
	5.5	0.849722	0.830612	0.892193	0.630093	0.979303	0.837267	0.739224		0.976704
	6	0.71704	0.604074	0.653027	0.472632	0.587821	0.588172	0.268107	0.497664	0.406412
	6.5	0.0184058	0.0197453	0.0341847	0.0192176	0.0202791	0.137664	0.0259386	0.0182847	0.0130121
	6.8	0.0108745	0.00543118	0.00695242			0.133584	0.00396538	0.00472224	0.0160452
	hASIC1a D351G + mamba1
	pH
	5	1	1	1	1	1	1
	5.5		0.979128	0.991375
	5.8			0.428758	0.340751
	6			0.0731881	0.110448	0.132782	0.141445
	6.3		0.158605	0.0113217
	6.5	0.000315128	0.0030025
	6.8	0.000606015
	hASIC1a F352L
	pH
	4	1	1	1	1	1	1	1	1	1	1	1	1	1	1	1	1	1	1	1	1	1
	5											1.1599		0.894713		0.998666	1.1159			1.00503	1.24124
	5.5											1.0974	0.996582	0.928448	0.949259			0.985419	0.875842	0.97248	1.048
	5.8											1.01877	1.00622		0.910005			0.918834		0.949225	0.88319	0.857622
	6		0.702554	0.57833	0.707226	0.759005	0.601174	0.617733	0.902385	0.838778	0.841872
	6.4	0.0703651		0.0809134	0.174502	0.146107	0.0483798	0.0695478	0.341636	0.376246	0.204495	0.312551	0.0664595		0.069087			0.00917049	0.00426367	0.0172715	0.206637
	6.5											0.137929	0.0137359			0.0200604
	6.8												0.00100674			0.000989736			0.000182322
	7												0.000602469			-0.000182564			0.0418005	0.000125566	1.64358e-05
	hASIC1a F352L + mamba1
	pH
	5	1	1	1	1	1	1	1	1	1	1	1	1	1
	5.5	1.02284	1.03813	0.852171	0.941991					0.964396	0.999157	0.993228	0.956581	1.01708
	5.8				0.771031							0.469243	0.503297	0.621528
	6	0.854495	0.878528	0.281676	0.497933	0.710815	0.292292	0.26752	0.271287		0.540532	0.186227	0.251585	0.171355
	6.3	0.161725	0.262878	0.0471055								0.0951946
	6.5	0.0280607	0.0169775	0.00595206								0.00103798	0.0307819
	6.8	0.00299653	0.00228096
