# Supplementary material for: Structural insights into human acid-sensing ion channel 1a inhibition by snake toxin mambalgin1
Source: eLife journal article supplement (doi:10.7554/elife.57096), 2020-09-11
Supplement: supp [file elife-57096-supp-v1.zip › elife_poa_e57096_Figure_6_source_data_1.xlsx]

## Sheet: Raw Data
Figure 6e. pH-dependence curves of hASIC1a and its mutants.
	pH	hASIC1a-WT channel current (nA)
		cell-1	cell-2	cell-3	cell-4	cell-5
	5.8	-3.02878	-3.47889	-6.83265	-2.09792	-6.24812
	5.9	-3.32121	-3.35393	-6.43497	-2.13447	-7.36821
	6	-2.61531	-3.36293	-5.94108	-1.78237	-6.96966
	6.3	-2.76998	-3.3324	-4.53429	-1.85054	-7.07785
	6.5	-1.72241	-1.40583	-1.84229	-0.717616	-1.91389
	6.8	-0.163947	-0.0816626			-0.096664
	pH	hASIC1a-R155L channel current (nA)
		cell-1	cell-2	cell-3	cell-4	cell-5	cell-6	cell-7	cell-8	cell-9	cell-10	cell-11	cell-12	cell-13	cell-14	cell-15	cell-16	cell-17	cell-18	cell-19	cell-20	cell-21
	4	-6.16296	-4.15112	-3.57482	-2.94921	-2.64701	-9.80231	-9.12915	-10.3903	-7.75816	-11.2119	-12.0272	-10.2625	-6.74442	-3.71044	-12.8973	-12.2595	-0.861246	-10.4764	-10.7586	-9.7296	-9.8439
	5	-6.11379		-3.59427
	5.5		-4.19651					-9.37455
	5.8	-5.73588						-8.54482
	6		-2.73968		-2.13279			-8.4729	-10.2933	-6.58134	-10.9182
	6.3		-2.61834			-1.87401	-5.32798	-7.71251	-9.5465	-4.27499	-10.7099
	6.4							-5.8729				-8.97941	-7.50387	-4.87141	-0.79782	-7.66129	-6.53786	-0.198728	-8.22631	-7.75607	-7.20727	-6.71233
	6.5		-2.20656								-3.1433
	6.6		-0.94299				-1.46142	-1.56358
	6.8		-0.099952							-0.0794781	-0.184026
	7		-0.00414416						-0.0656721
	pH	hASIC1a-R155F channel current (nA)
		cell-1	cell-2	cell-3	cell-4	cell-5	cell-6	ccell-7
	4	-13.1819	-16.0676	-10.775	-9.79901	-7.98256	-8.14363	-10.226
	5	-13.8381	-16.2937				-7.86809
	5.5		-16.4188
	5.8		-16.9208				-7.6573
	6		-14.2029			-7.16142	-6.81914
	6.3		-11.9473	-6.4734	-6.93246			-6.40691
	6.4		-11.994					-5.22677
	6.5		-7.16956	-5.80949	-4.87414			-5.02178
	6.6		-4.12041		-3.83795
	6.7		-2.02829	-1.4121		-1.67953		-2.59941
	6.8		-0.770347					-1.4766
	7		-0.00547518
	pH	hASIC1a-Q102R/D167E channel current (nA)
		cell-1	cell-2	cell-3	cell-4	cell-5	cell-6	ccell-7	cell-8
	4	-10.0963	-10.05	-11.1693	-15.1068	-6.6178	-19.5866	-19.5607	-8.94679
	5	-9.99849	-9.95012	-11.6542
	5.5	-10.1989			-15.0015
	5.8	-9.63565			-14.9714			-19.5308
	6	-8.63996			-13.776	-5.3671	-18.7429		-6.71688
	6.3	-7.74547			-12.4121	-4.36089	-16.236		-5.48107
	6.4	-8.3522			-12.8213	-4.17612	-12.891		-5.26928
	6.5	-7.38545			-10.9125	-3.2888	-8.37697		-4.80885
	6.6	-3.35042					-4.45371		-1.79259
	6.7	-2.04529					-2.77345		-0.968206
	6.8	-0.804092					-0.606213		-0.317995
	7	-0.151582					-0.0952107
	7.2	-0.0184477
Figure 6f. The inhibitory effect of wild-type Mamba1 (500 nM) on hASIC1a mutants.
	hASIC1a-WT	pH 6.0	-15.3119	-4.71662	-5.76389	-15.9245	-15.3811	-16.4809	-7.74902	-8.87697	-8.09001	-8.2176	-10.6721
		pH 6.0 + Mamba1	-5.64377	-1.39065	-2.75873	-2.40792	-3.40421	-5.68914	-2.98318	-3.35974	-3.61101	-3.61672	-2.7111
	hASIC1a-R155L	pH 6.0	-5.10383	-5.93592	-5.21246	-5.38509	-10.4998	-5.54953
		pH 6.0 + Mamba1	-3.54223	-3.08415	-3.23121	-3.26397	-7.10957	-3.0275
	hASIC1a-R155F	pH 6.0	-4.18709	-7.67518	-5.91306
		pH 6.0 + Mamba1	-2.90138	-4.81302	-3.97401
	hASIC1a-Q102R/D167E	pH 6.0	-18.9553	-6.40068	-8.81562
		pH 6.0 + Mamba1	-9.21467	-3.20001	-5.38483

## Sheet: Normalized Data
	hASIC1a
	pH
	5.8	-3.02878	-3.47889	-6.83265	-2.09792	-6.24812
	5.9	-3.32121	-3.35393	-6.43497	-2.13447	-7.36821
	6	-2.61531	-3.36293	-5.94108	-1.78237	-6.96966
	6.3	-2.76998	-3.3324	-4.53429	-1.85054	-7.07785
	6.5	-1.72241	-1.40583	-1.84229	-0.717616	-1.91389
	6.8	-0.163947	-0.0816626			-0.096664
	hASIC1a R155L
	pH
	4	1	1	1	1	1	1	1	1	1	1	1	1	1	1	1	1	1	1	1	1	1
	5	0.992021		1.00544
	5.5		1.01093					1.02688
	5.8	0.930702						0.935993
	6		0.659987		0.723173			0.928114	0.990664	0.848311	0.973807
	6.3		0.630754			0.707972	0.543544	0.844822	0.918786	0.551031	0.955226
	6.4							0.643312				0.746591	0.731193	0.722287	0.21502	0.594025	0.533288	0.230745	0.785224	0.720919	0.740757	0.681877
	6.5		0.531558								0.280354
	6.6		0.227165				0.149089	0.171273
	6.8		0.0240783							0.0102444	0.0164134
	7		0.000998324						0.00632049
	hASIC1a R155F
	pH
	4	1	1	1	1	1	1	1
	5	1.04978	1.01407				0.966166
	5.5		1.02186
	5.8		1.0531				0.940282
	6		0.883948			0.897133	0.837359
	6.3		0.743566	0.600778	0.707465			0.62653
	6.4		0.746469					0.511124
	6.5		0.446212	0.539162	0.497412			0.491078
	6.6		0.256442		0.391668
	6.7		0.126235	0.131053		0.2104		0.254195
	6.8		0.0479441					0.144396
	7		0.000340759
	hASIC1a Q102RD167E
	pH
	4	1	1	1	1	1	1	1	1
	5	0.990308	0.990065	1.04342
	5.5	1.01015			0.993026
	5.8	0.95437			0.991037			0.998474
	6	0.855752			0.911907	0.811009	0.956923		0.750759
	6.3	0.767156			0.821624	0.658964	0.828934		0.61263
	6.4	0.82725			0.848708	0.631044	0.658153		0.588957
	6.5	0.731497			0.722356	0.496963	0.427688		0.537494
	6.6	0.331845					0.227385		0.200361
	6.7	0.202577					0.141599		0.108218
	6.8	0.0796419					0.0309504		0.0355429
	7	0.0150136					0.00486101
	7.2	0.00182717
	hASIC1a + mamba1
	WT	0.368587	0.294841	0.478623	0.151209	0.221323	0.345195	0.384975	0.378478	0.446354	0.440118	0.254035
	R155L	0.694034	0.519573	0.619902	0.606112	0.677116	0.545541
	R155F	0.692935	0.627089	0.672073
	Q102RD167E	0.486126	0.499949	0.610828
