# Supplementary figures and images for: Structural insights into human acid-sensing ion channel 1a inhibition by snake toxin mambalgin1
Source: eLife journal article supplement (doi:10.7554/elife.57096), 2020-09-11

## Figure 3 - figure supplement 1

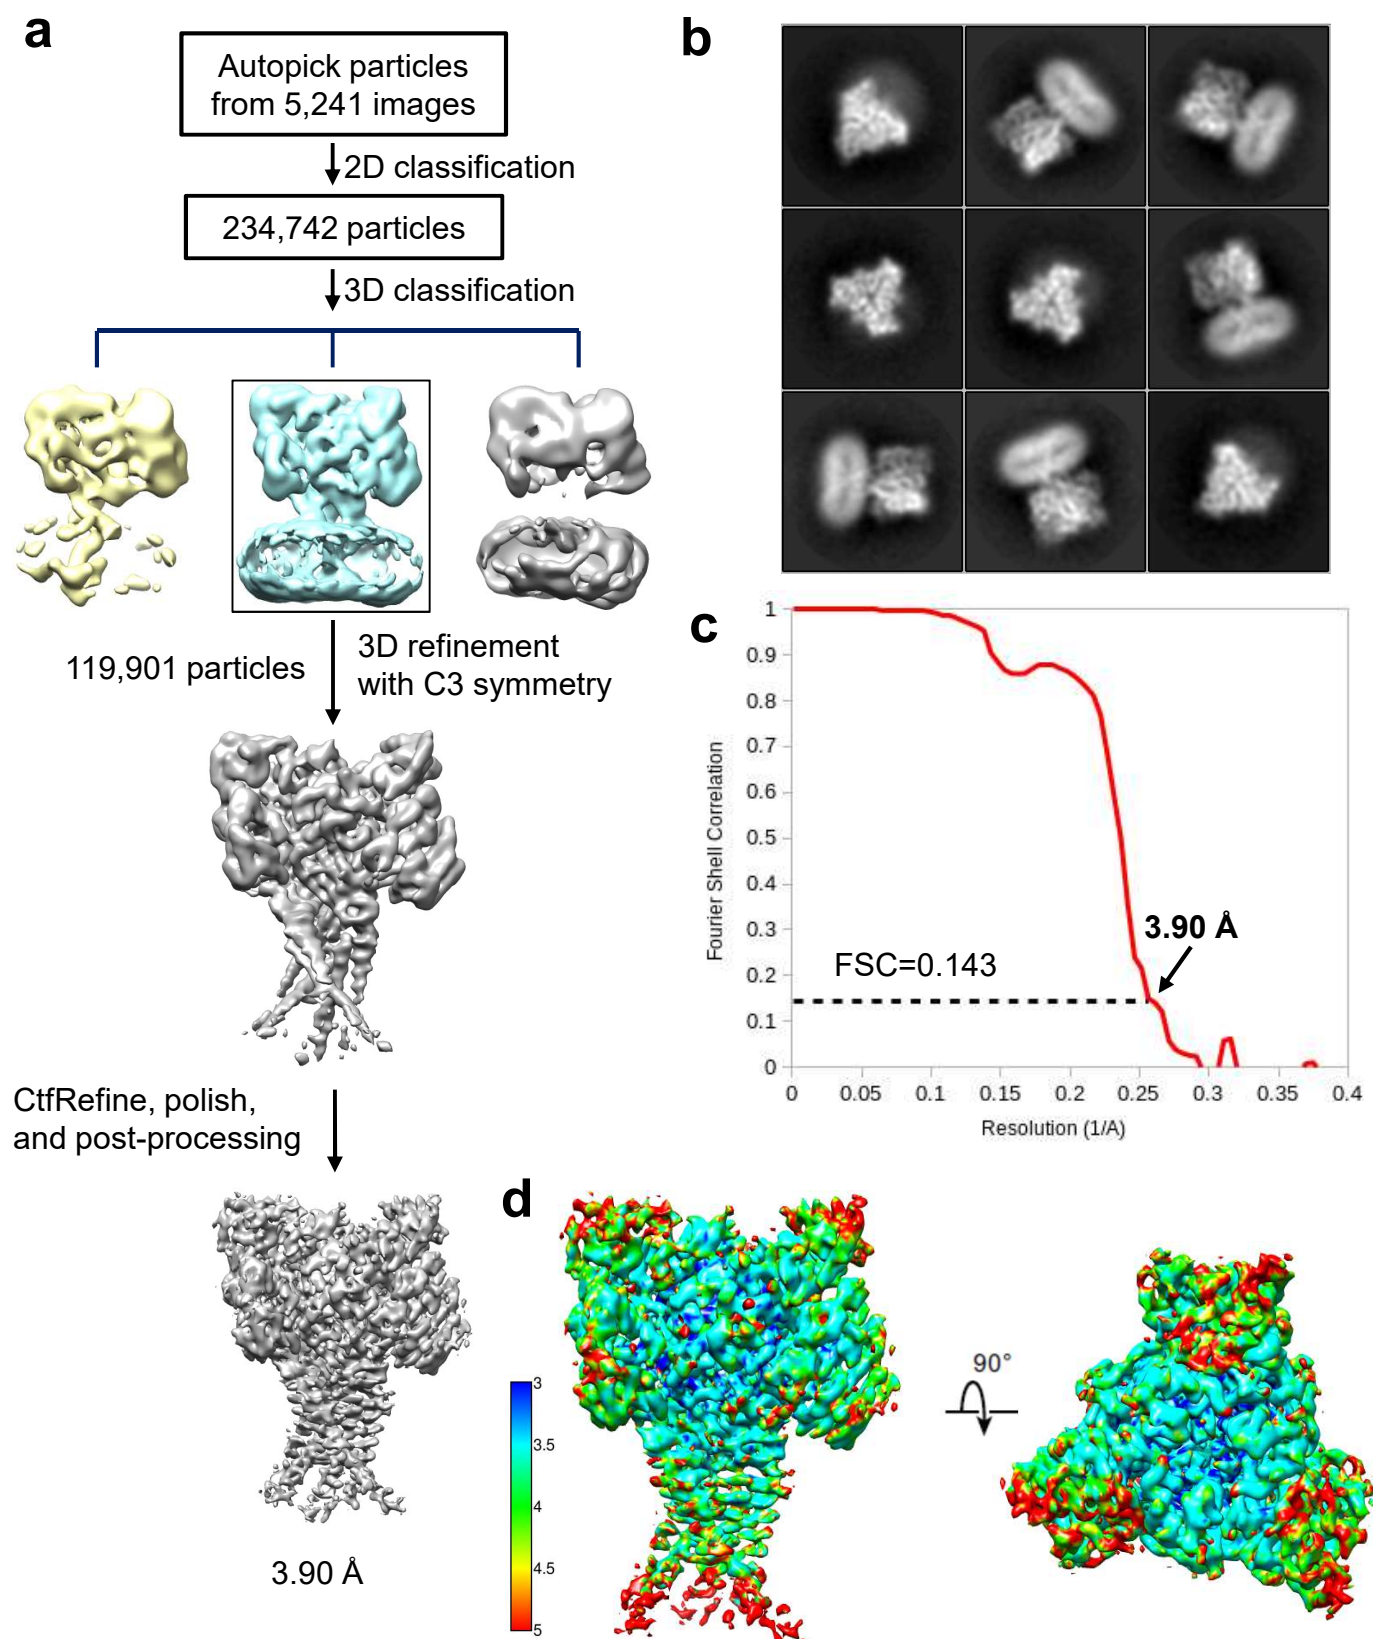

Supplement: supp [file elife-57096-supp-v1.zip]

Figure 1 - figure supplement 1

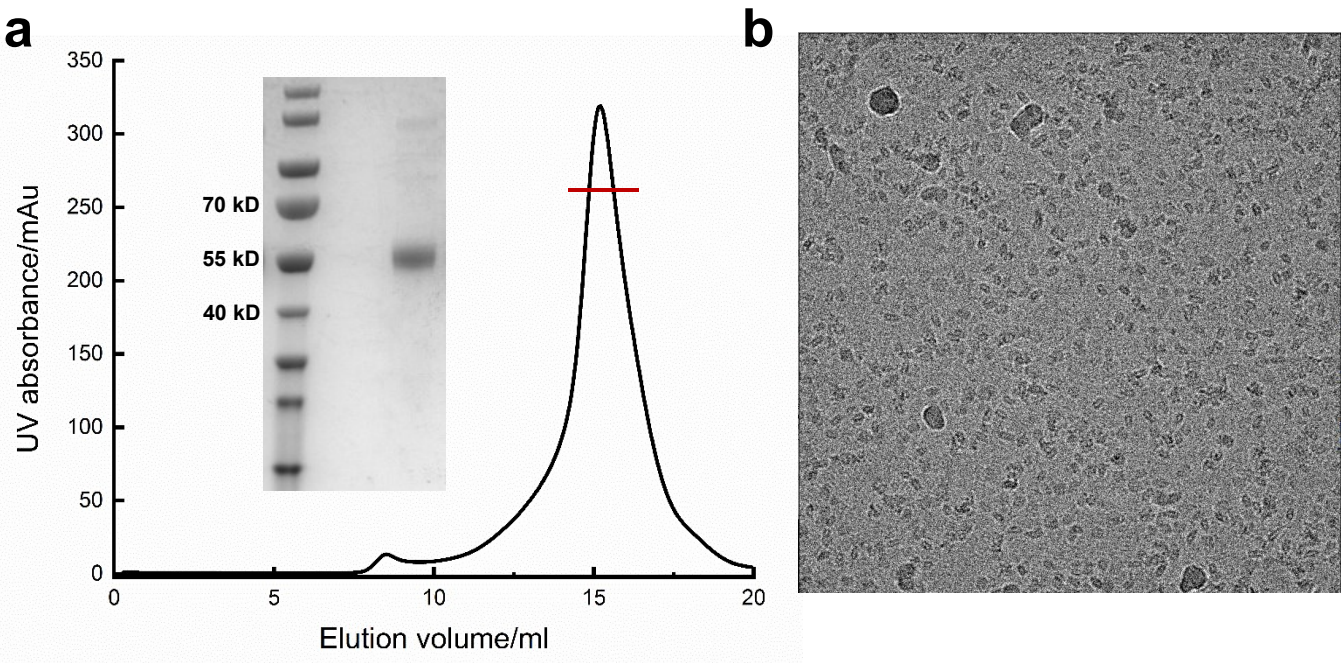

Supplement: supp [file elife-57096-supp-v1.zip › elife_poa_e57096_Figure_1_figure_supplement_1.pdf]

Figure 2 - figure supplement 1

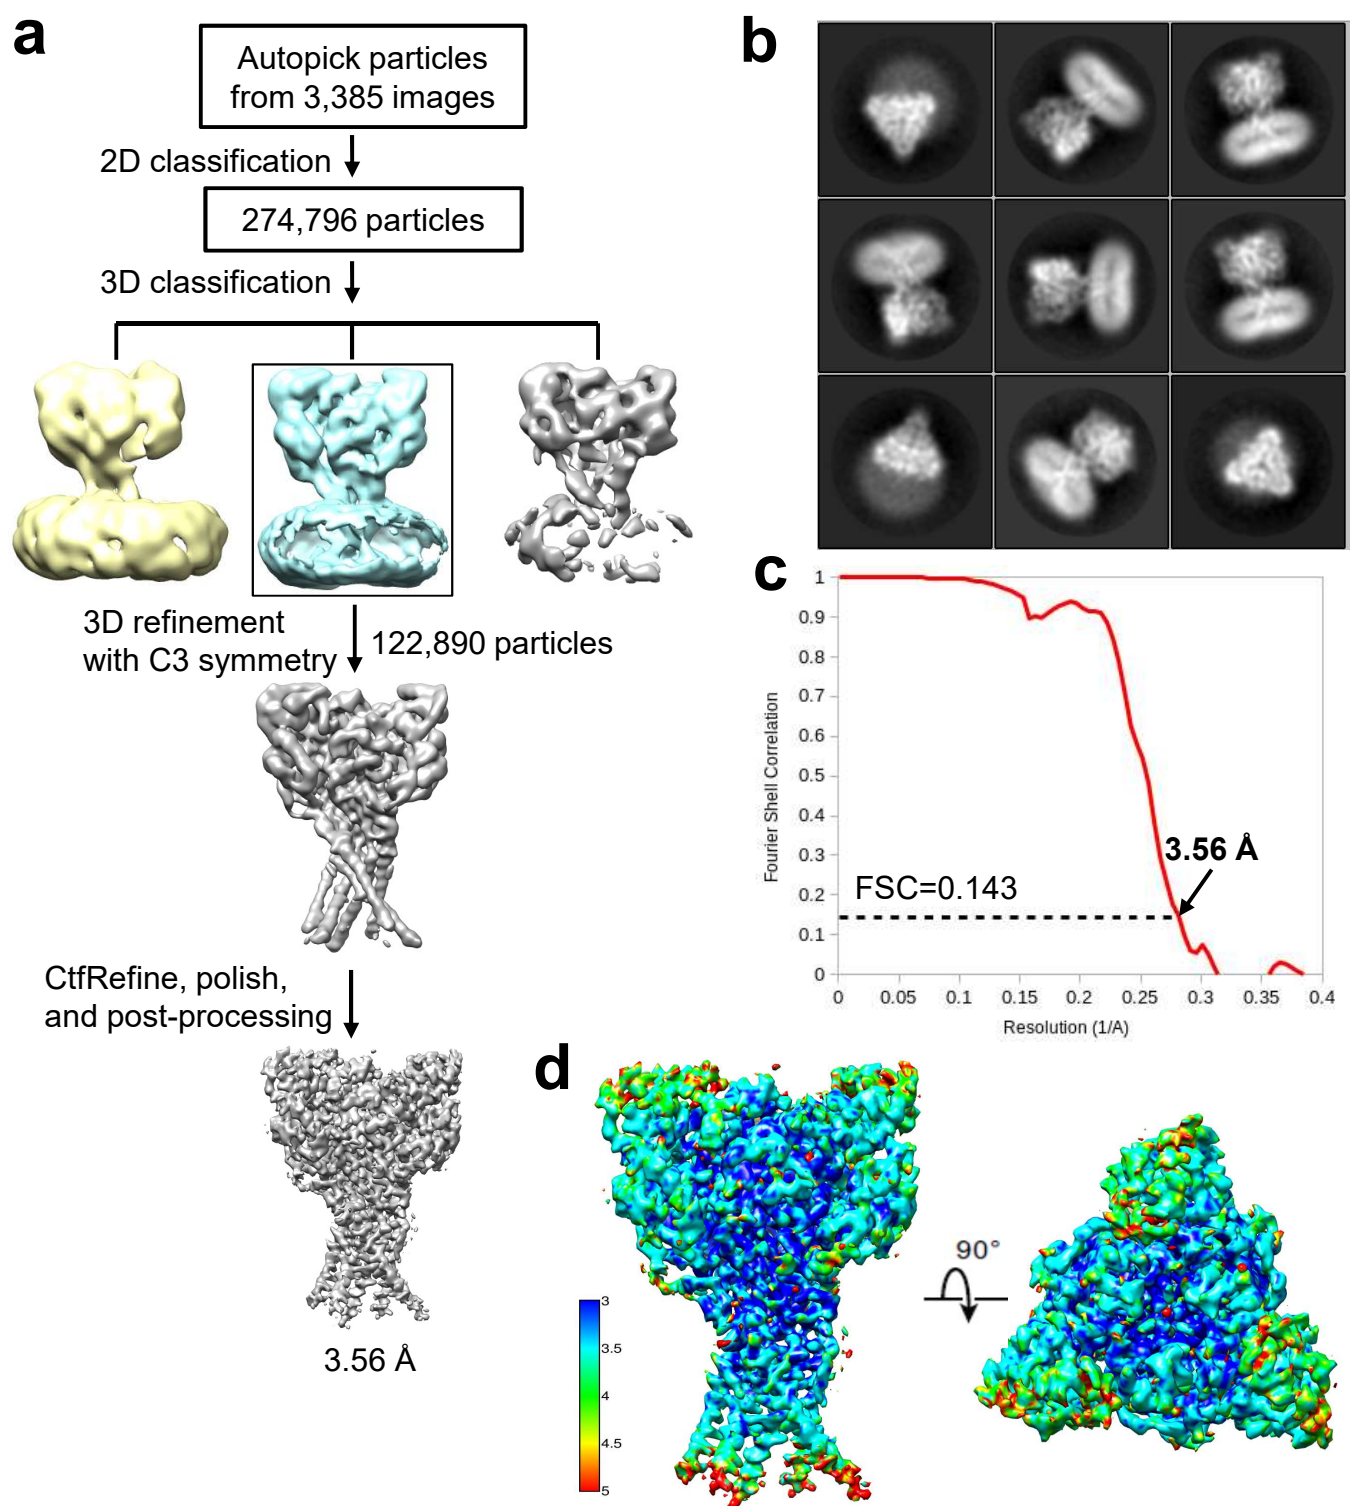

Supplement: supp [file elife-57096-supp-v1.zip › elife_poa_e57096_Figure_2_figure_supplement_1.pdf]

Figure 2 - figure supplement 2

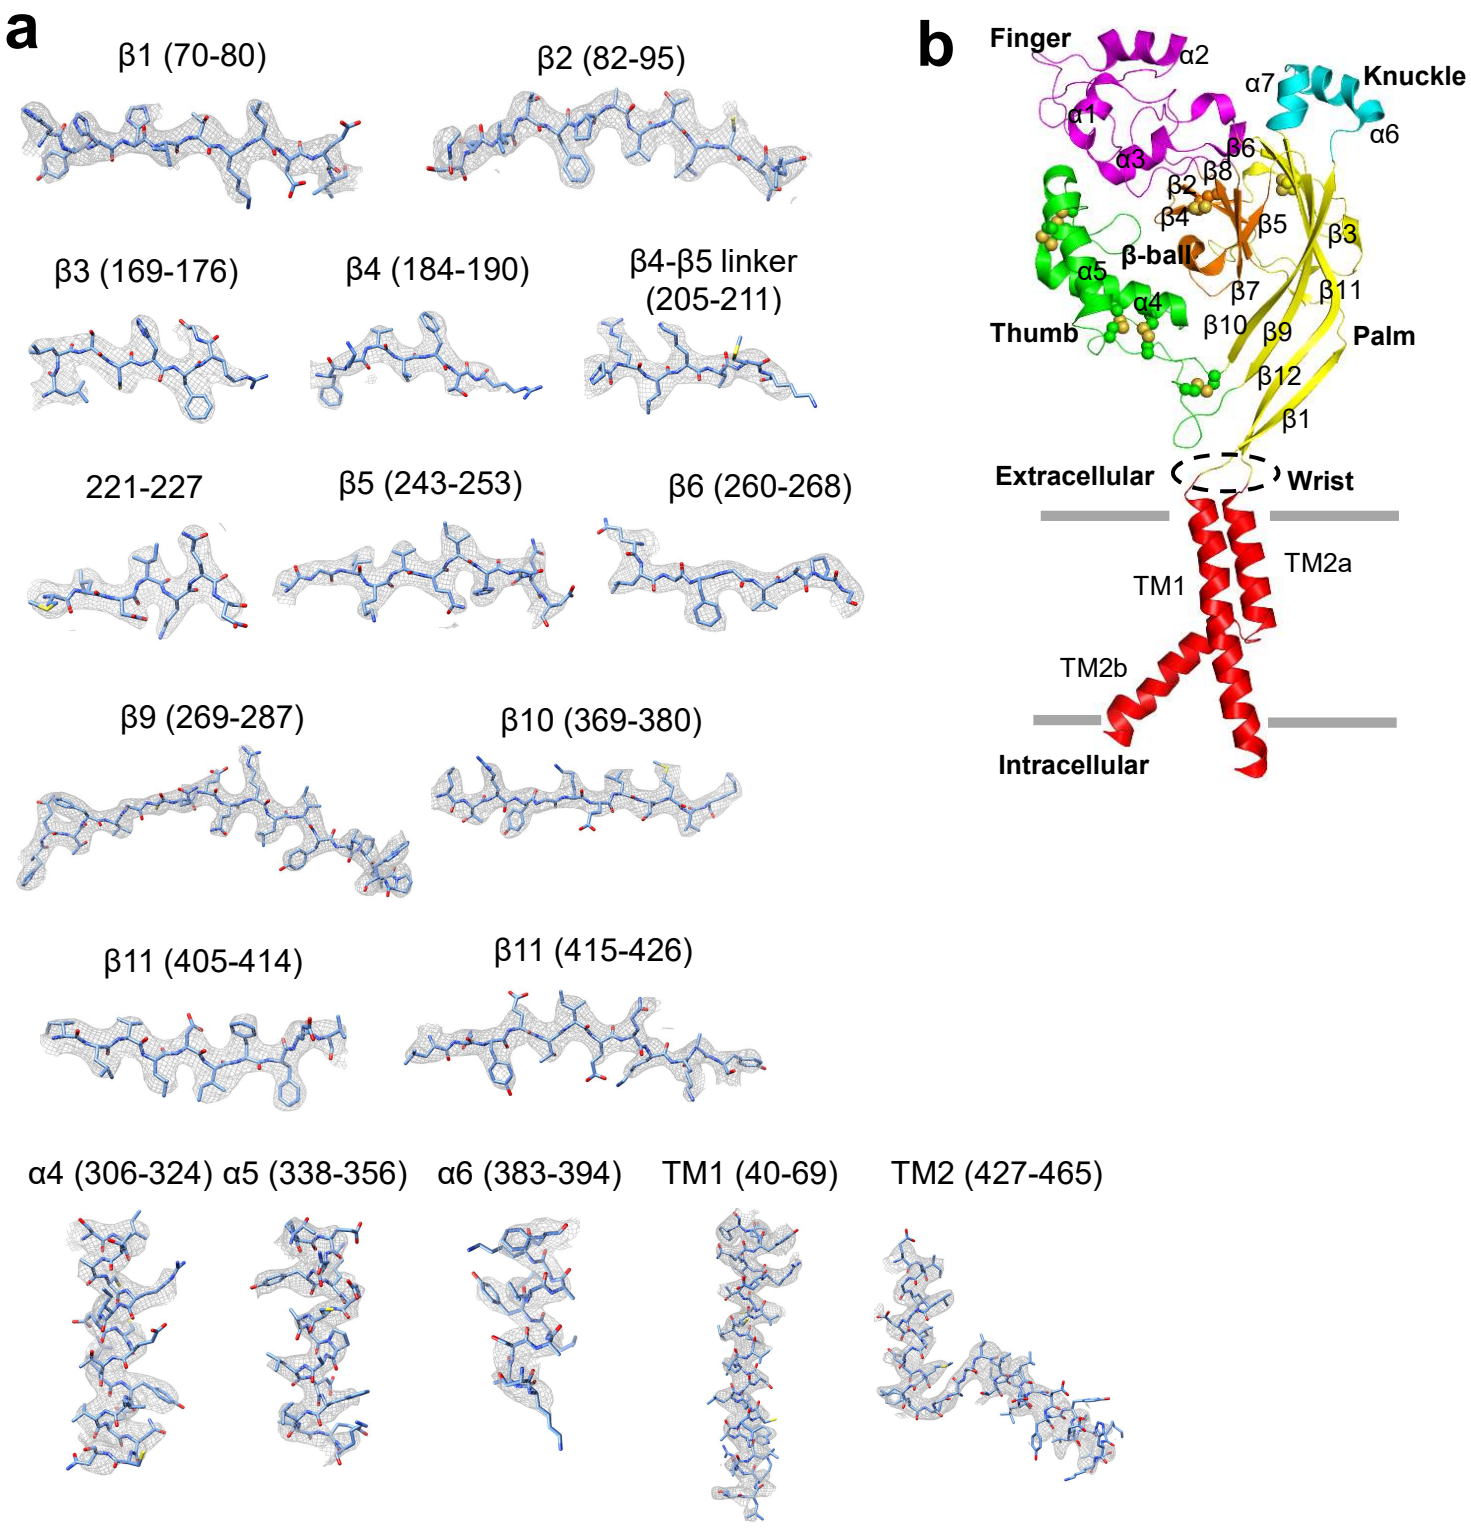

Supplement: supp [file elife-57096-supp-v1.zip › elife_poa_e57096_Figure_2_figure_supplement_2.pdf]

**Figure 3 - figure supplement 2**

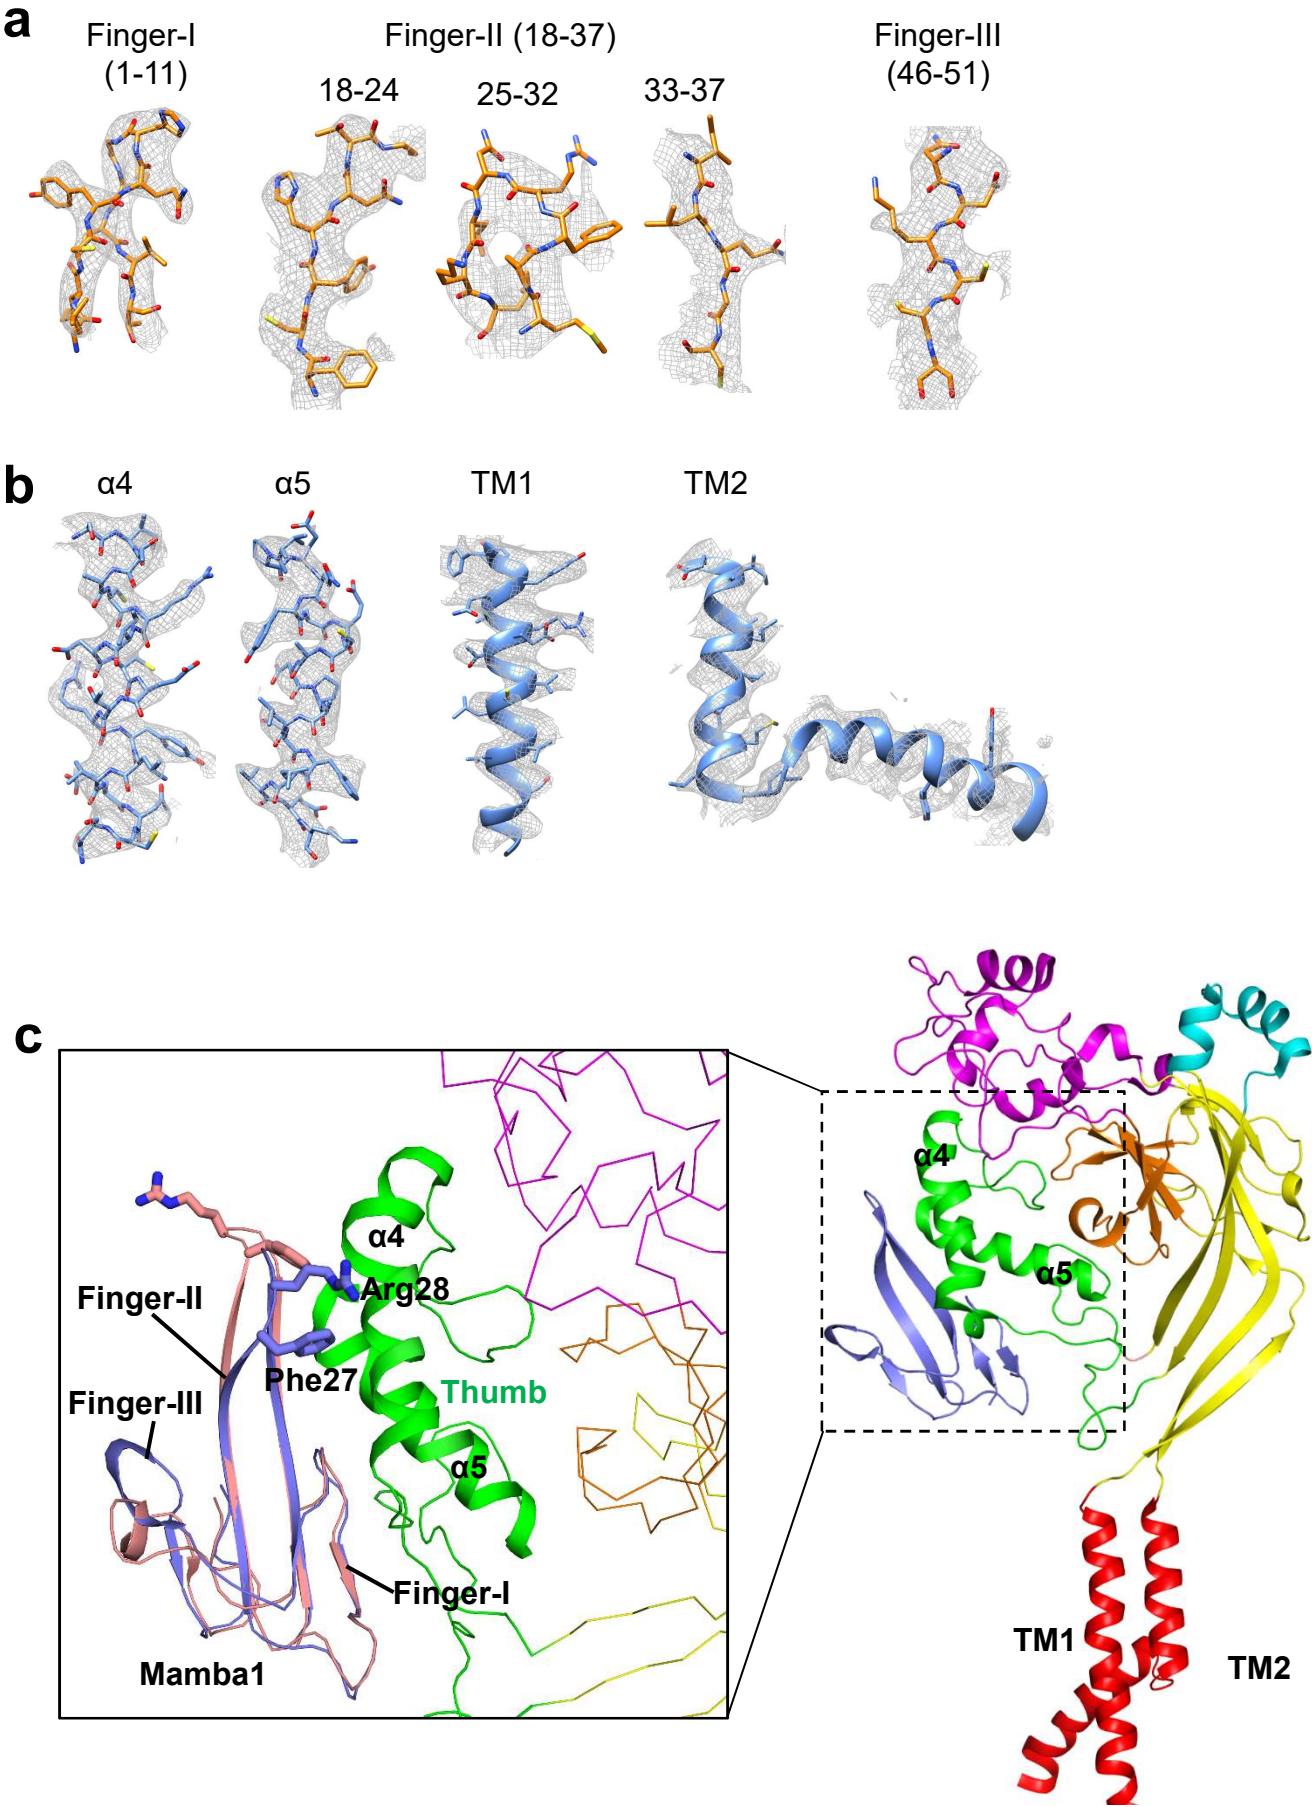

Supplement: supp [file elife-57096-supp-v1.zip › elife_poa_e57096_Figure_3_figure_supplement_2.pdf]

Figure 3 - figure supplement 3

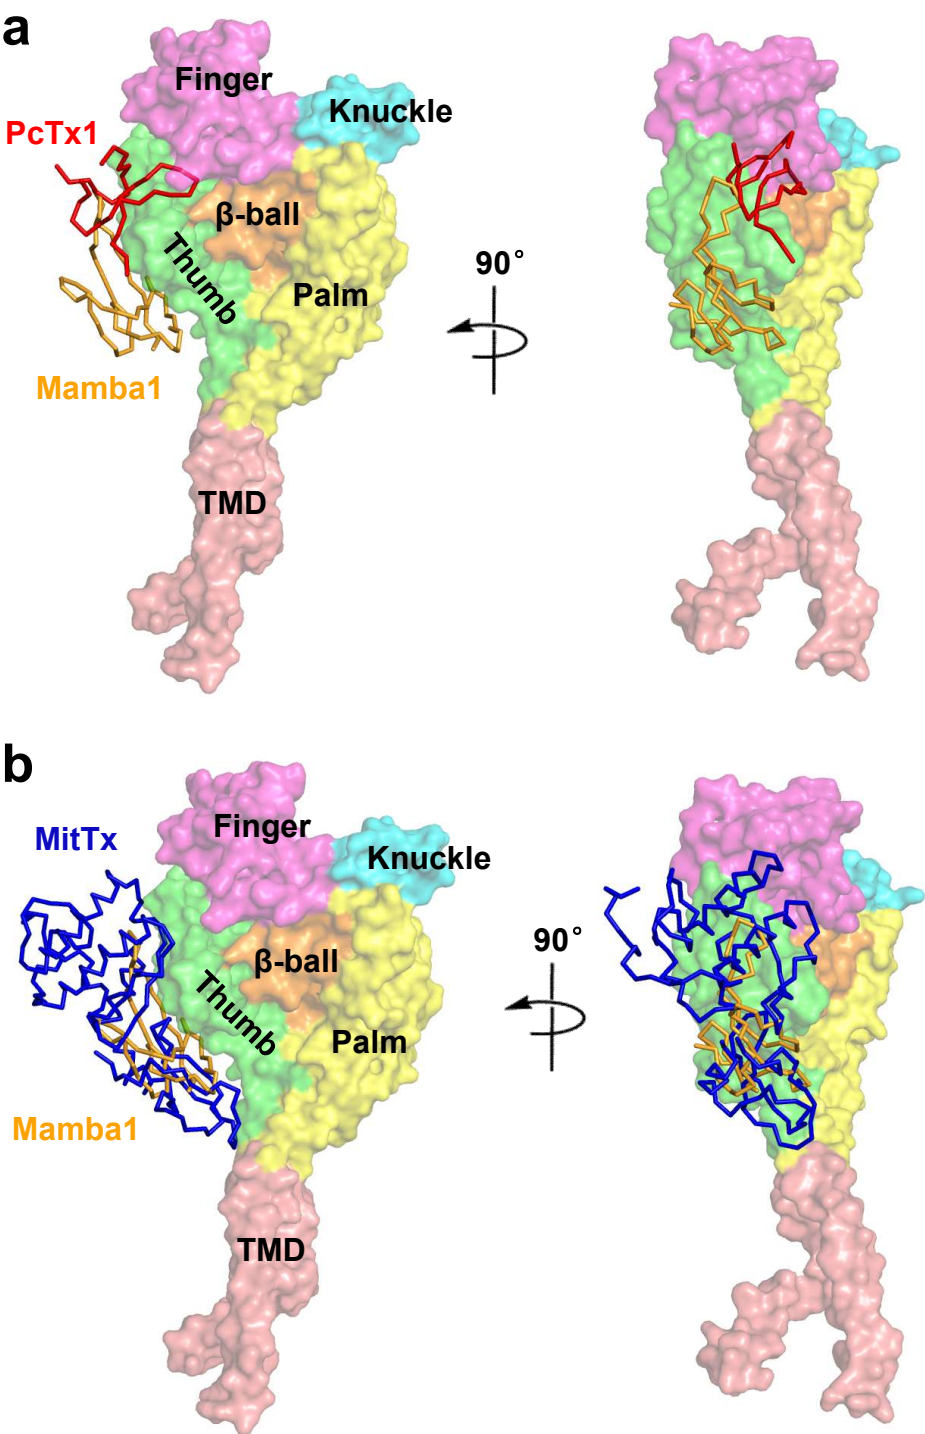

Supplement: supp [file elife-57096-supp-v1.zip › elife_poa_e57096_Figure_3_figure_supplement_3.pdf]

Figure 3 - figure supplement 4

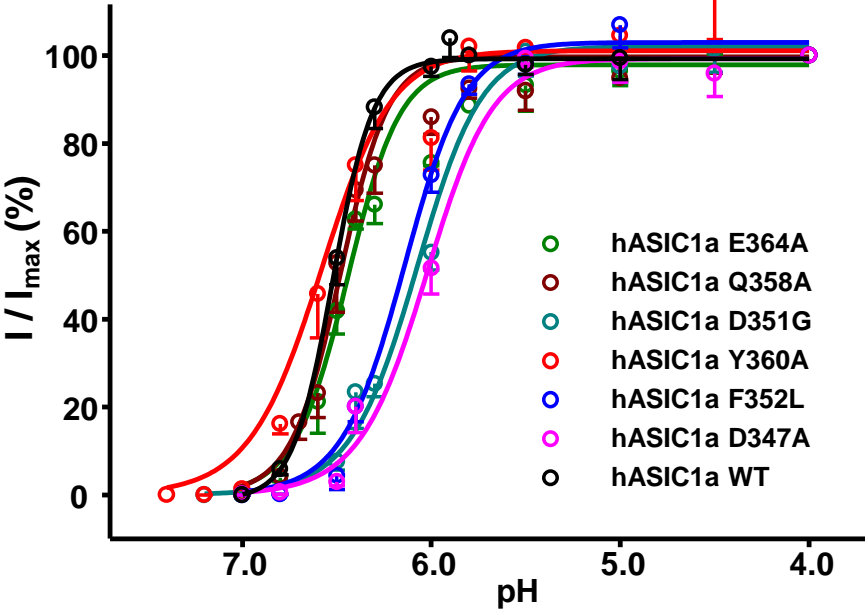

| hASIC1a | pH <sub>50</sub> |
|---------|------------------|
| D347A   | 5.88 ± 0.03      |
| D351G   | 6.04 ± 0.05      |
| F352L   | 6.13 ± 0.01      |
| E364A   | 6.51 ± 0.04      |
| Q358A   | 6.51 ± 0.02      |
| Y360A   | 6.60 ± 0.07      |
| WT      | 6.46 ± 0.02      |

Supplement: supp [file elife-57096-supp-v1.zip › elife_poa_e57096_Figure_3_figure_supplement_4.pdf]

Figure 3 - figure supplement 5

a

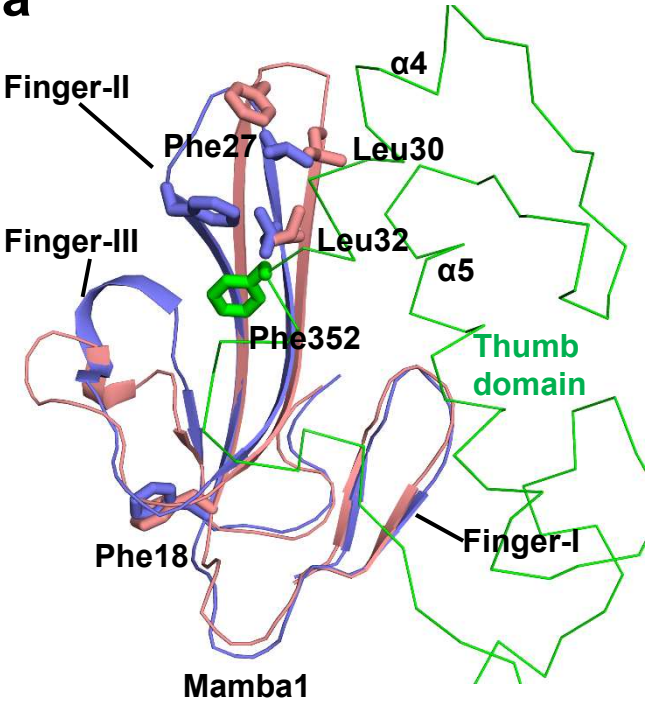

b

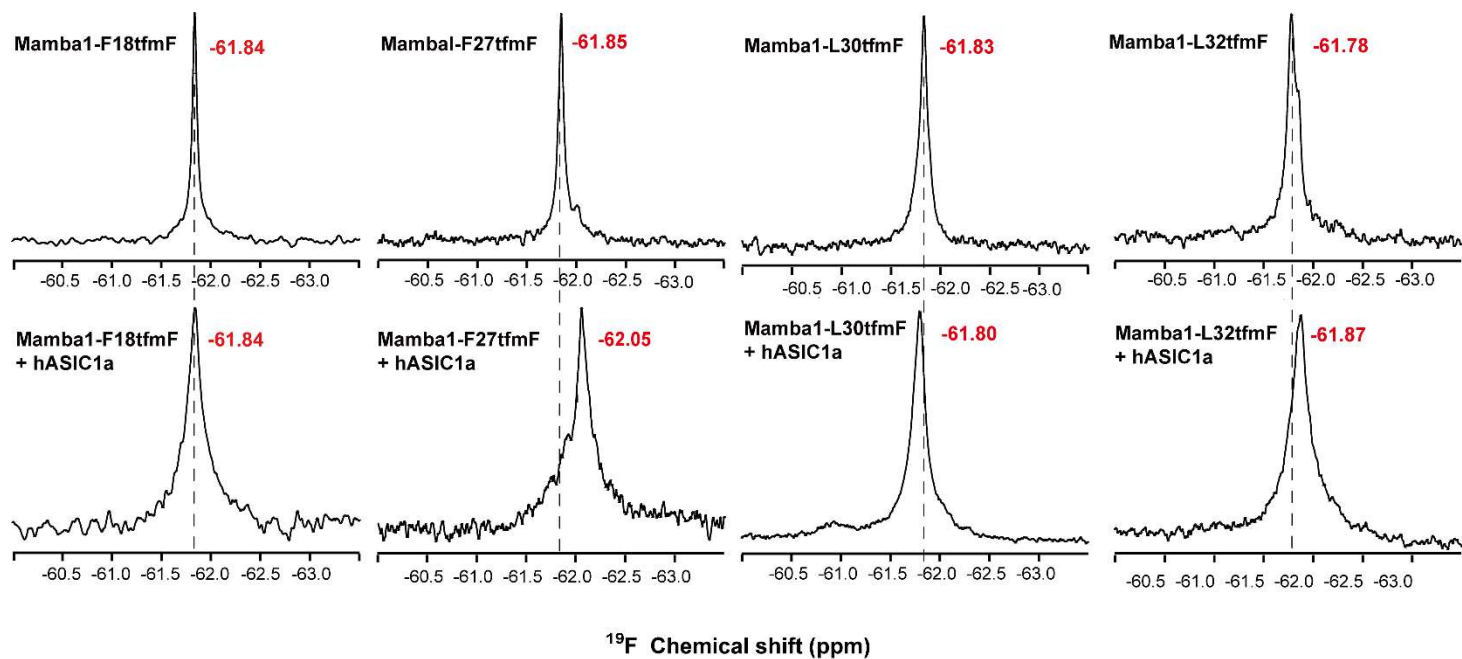

Supplement: supp [file elife-57096-supp-v1.zip › elife_poa_e57096_Figure_3_figure_supplement_5.pdf]

**Figure 4 - figure supplement 1**

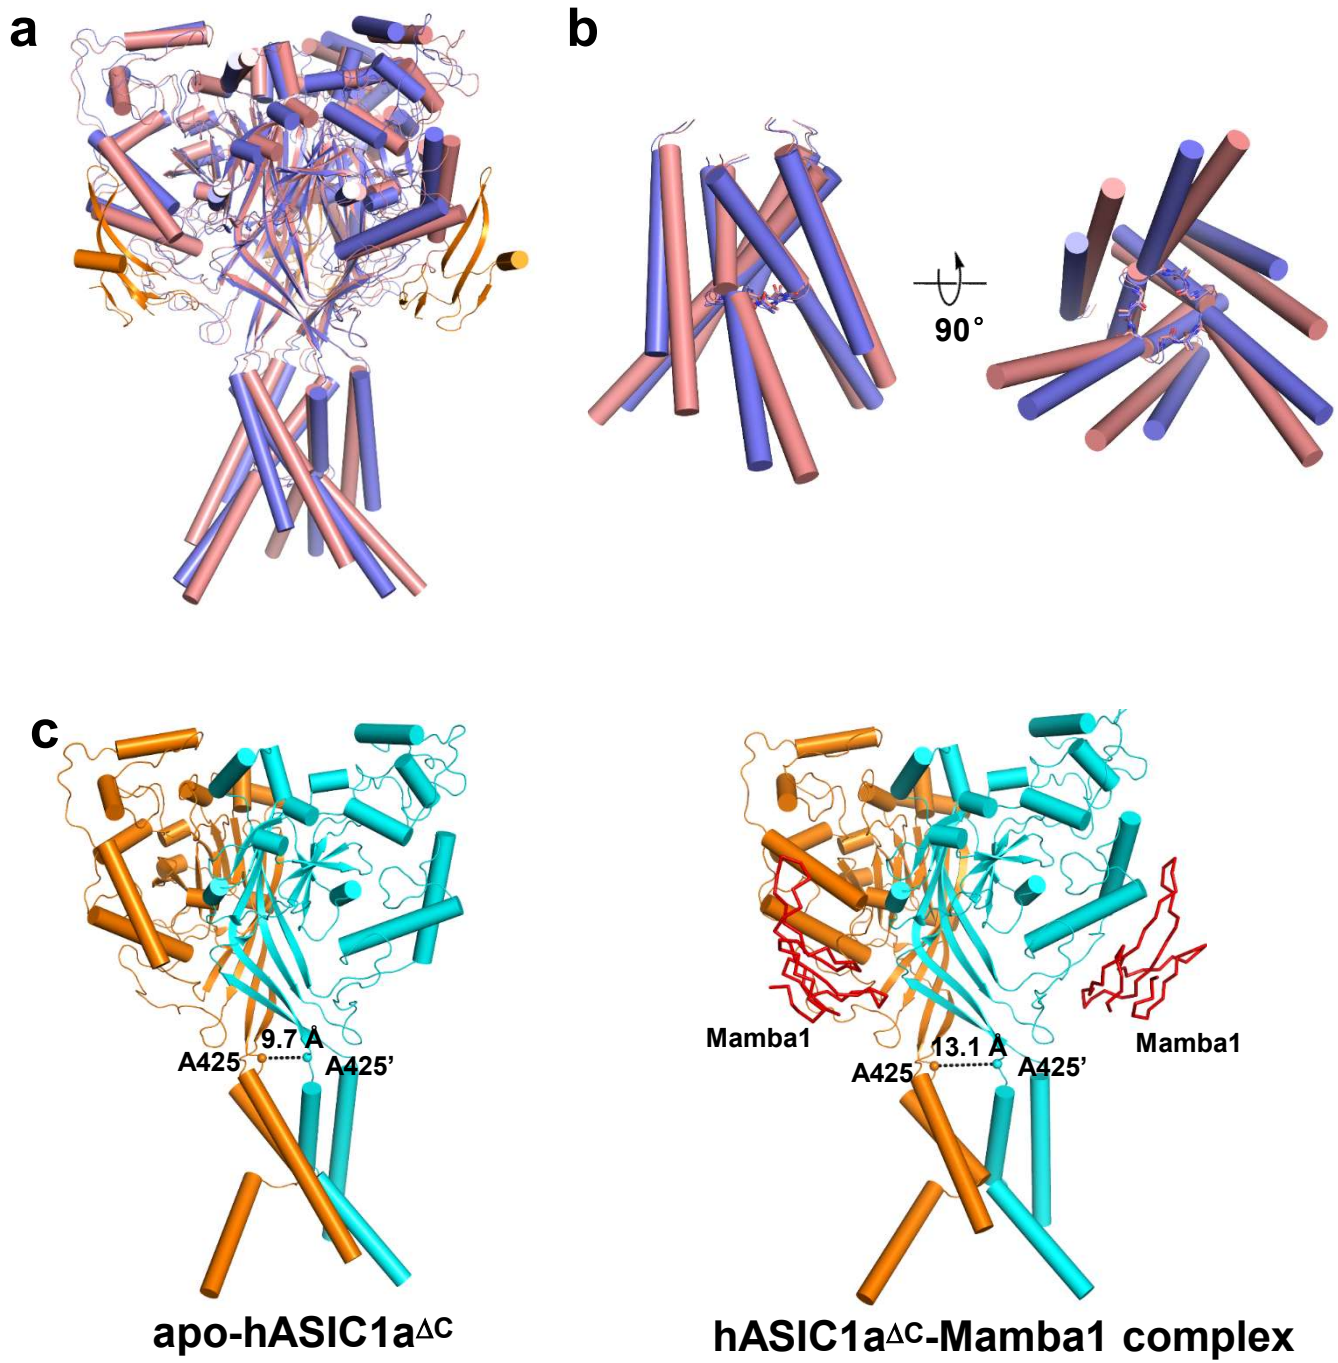

Supplement: supp [file elife-57096-supp-v1.zip › elife_poa_e57096_Figure_4_figure_supplement_1.pdf]

Figure 6 - figure supplement 1

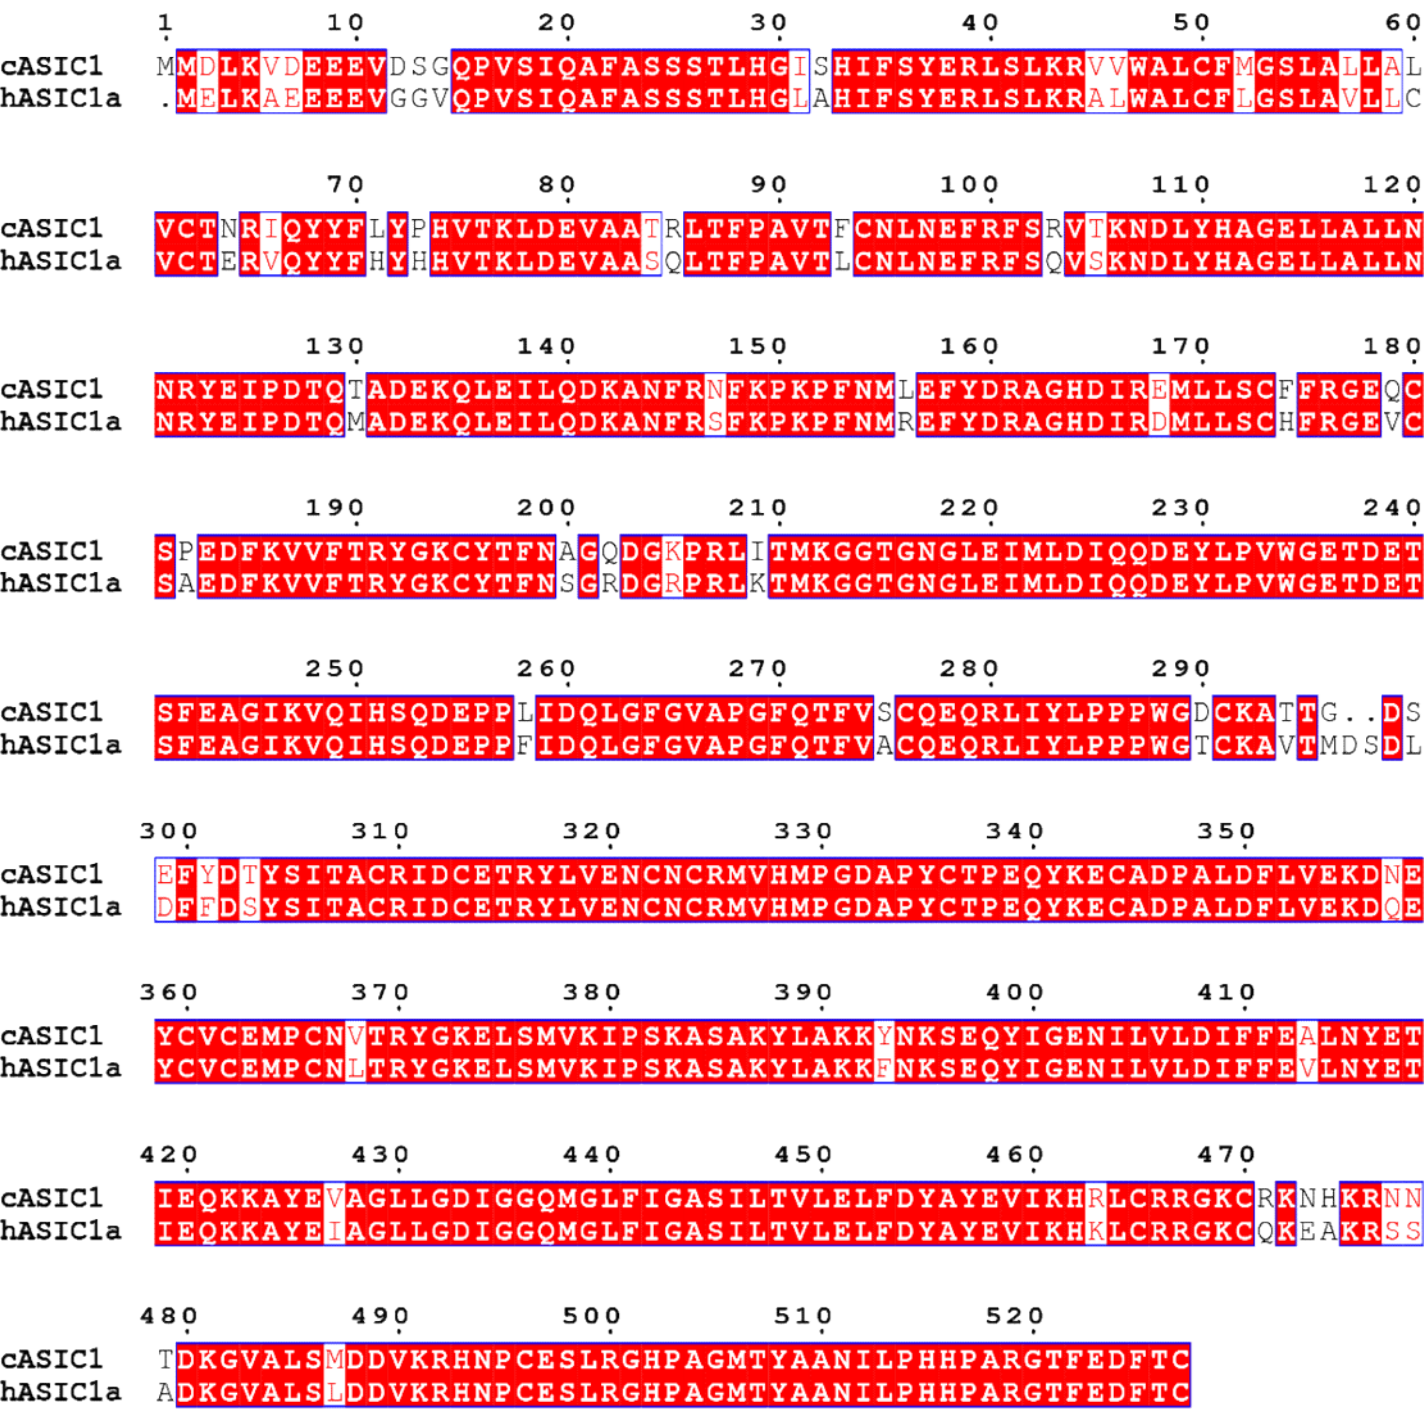

Supplement: supp [file elife-57096-supp-v1.zip › elife_poa_e57096_Figure_6_figure_supplement_1.pdf]

**Figure 6 - figure supplement 2**

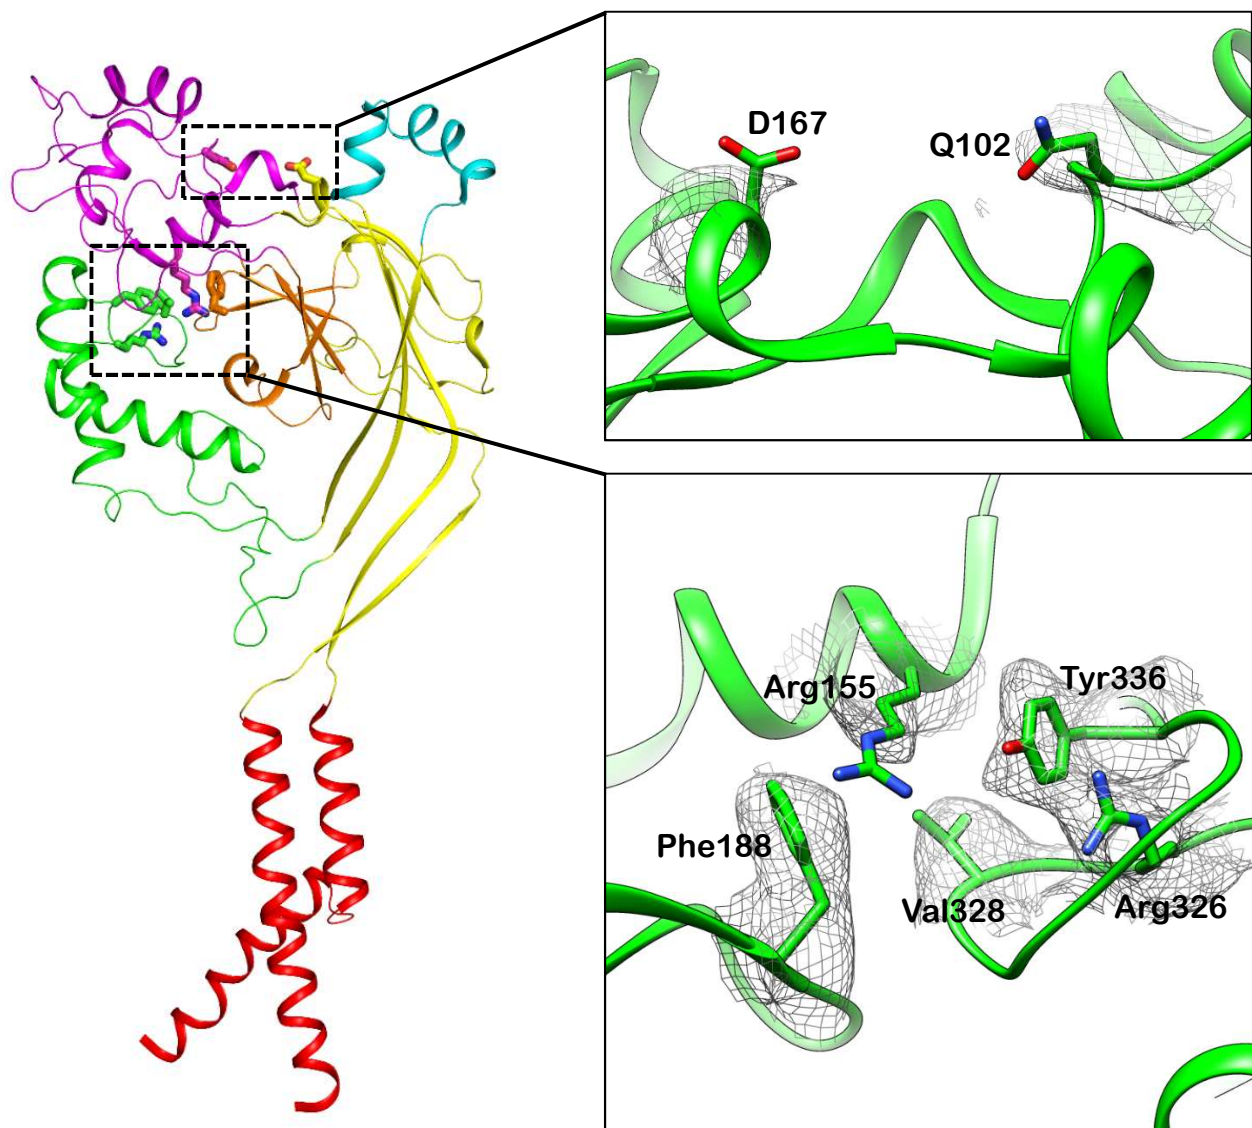

Supplement: supp [file elife-57096-supp-v1.zip › elife_poa_e57096_Figure_6_figure_supplement_2.pdf]
